# Supplementary material
Source: PubMed Central journal article supplement (PMC1691899)
Supplement: 15615677s01.pdf [file 15615677s01.pdf]

**Appendix A** Occurrence data of Argentine Ant (*Linepithem humile*). The first column refers to presence (P) or absence (A) of the species, and presences from the considered native area are indicated with \*. Data has been obtained from museum and personal collections, and scientific literature (Appendix 2).

| <i>Pres Lh</i>   | <i>City/ Town/ Place</i>                        | <i>Longitude</i> | <i>Latitude</i> | <i>Pres Lh</i>   | <i>City/ Town/ Place</i>         | <i>Longitude</i> | <i>Latitude</i> |
|------------------|-------------------------------------------------|------------------|-----------------|------------------|----------------------------------|------------------|-----------------|
| <b>Argentina</b> |                                                 |                  |                 | P*               | Entre Ríos, P. N. El Palmar      | -58,209          | -31,875         |
| P                | Chubut, Rawson                                  | -65,100          | -43,300         | P*               | Formosa, Formosa                 | -58,183          | -26,183         |
| P                | Chubut, 3km N Puerto Lobos                      | -65,100          | -41,973         | P*               | Entre Ríos, Colon                | -58,117          | -32,233         |
| P*               | Santa Fe, Rosario                               | -60,683          | -32,917         | P*               | Formosa, Mojón de Fierro         | -58,050          | -26,050         |
| P*               | Santa Fe, Rosario                               | -60,667          | -32,950         | P*               | Buenos Aires, La Plata           | -57,950          | -34,933         |
| P*               | Entre Ríos, P. N. Pre Delta                     | -60,659          | -32,965         | P*               | Formosa, Clorinda                | -57,717          | -25,283         |
| P*               | Entre Ríos, Diamante                            | -60,647          | -32,016         | P*               | Formosa, Puerto Pilcomayo        | -57,653          | -25,368         |
| P*               | Santa Fe, main road between Paraná and Santa Fe | -60,572          | -31,677         | P*               | Monte Caseros                    | -57,630          | -30,244         |
| P*               | Santa Fe, Fives Lille                           | -60,350          | -30,150         | P*               | Corrientes, Ita Ibate            | -57,167          | -27,417         |
| P*               | Entre Ríos, Victoria                            | -60,167          | -32,635         | P*               | Corrientes, Alvear               | -56,552          | -29,110         |
| P*               | Entre Ríos, Paraná, Estación Sosa               | -60,000          | -31,667         | P*               | Corrientes, Alvear, Port Alvear  | -56,550          | -29,100         |
| P*               | Entre Ríos, Paraná, Estación Sosa               | -59,917          | -31,733         | P*               | Corrientes, Sto. Tomé            | -56,050          | -28,550         |
| P*               | Entre Ríos, Gualeguay                           | -59,333          | -33,150         | P*               | Misiones, Posadas                | -55,883          | -27,383         |
| P*               | Santa Fe, Porto Ocampo                          | -59,265          | -28,498         | A                | Misiones, P. N. Iguazú           | -54,436          | -25,703         |
| P*               | Lima, Zárete                                    | -59,200          | -34,050         | P*               | Misiones, P. N. Iguazú           | -54,433          | -25,700         |
| P*               | Entre Ríos, Port Ibicuy                         | -59,167          | -33,800         | <b>Australia</b> |                                  |                  |                 |
| P*               | Buenos Aires, Zárate                            | -59,018          | -34,103         | P                | Western Australia, Herdsman Lake | 115,800          | -31,917         |
| P*               | Entre Ríos, Villaguay                           | -59,017          | -31,850         | P                | Western Australia, Perth         | 115,833          | -31,933         |
| P*               | Buenos Aires, Rosas F. C. Sud                   | -58,933          | -35,967         | P                | Western Australia, Albany        | 117,892          | -35,017         |
| P*               | Buenos Aires, Campana                           | -58,931          | -34,199         | P                | Western Australia, Esperance     | 121,900          | -33,867         |
| P*               | Buenos Aires, R. Otamendi                       | -58,901          | -34,219         | P                | Adelaide                         | 138,600          | -34,933         |
| P*               | Buenos Aires, R. Otamendi                       | -58,900          | -34,233         | P                | Victoria, Swan Hill              | 143,567          | -35,350         |
| P*               | Entre Ríos, 10km S Medanos                      | -58,867          | -33,480         | P                | Melbourne                        | 144,967          | -37,817         |
| P*               | Chaco, Resistencia                              | -58,867          | -27,430         | P                | Victoria, 12km W Wangaratta      | 146,200          | -36,367         |
| P*               | Corrientes, Corrientes                          | -58,833          | -27,467         | P                | Tasmania, Launceston             | 147,167          | -41,450         |
| P*               | Corrientes, Paseo de la Patria                  | -58,573          | -27,318         | P                | Tasmania, Hobart                 | 147,333          | -42,917         |
| P*               | Olivos                                          | -58,500          | -34,517         | P                | New South Wales, Sydney          | 151,217          | -33,883         |
| P*               | Buenos Aires, Vicente López                     | -58,471          | -34,526         | <b>Belgium</b>   |                                  |                  |                 |
| P*               | Buenos Aires, Buenos Aires                      | -58,467          | -34,600         | P                | Bruxelles, Jardin Botanico       | 4,333            | 50,833          |
| P*               | Buenos Aires, R. Costanera Sur                  | -58,356          | -34,116         | <b>Bermuda</b>   |                                  |                  |                 |
| P*               | Buenos Aires, Buenos Aires                      | -58,350          | -34,633         | P                | Wreck Hill                       | -64,886          | 32,280          |
| P*               | Formosa, Herradura                              | -58,283          | -26,517         | P                | Cedar Hill                       | -64,864          | 32,252          |
| P*               | Buenos Aires, Isla Martín García                | -58,267          | -34,350         | P                | Southampton Parish               | -64,856          | 32,251          |

| <i>Pres Lh</i> | <i>City/ Town/ Place</i>                       | <i>Longitude</i> | <i>Latitude</i> |
|----------------|------------------------------------------------|------------------|-----------------|
| P              | Hamilton                                       | -64,784          | 32,294          |
| P              | Dockyards                                      | -64,783          | 31,300          |
| P              | Paget                                          | -64,782          | 32,278          |
| P              | Bermuda,                                       | -64,750          | 32,300          |
| P              | Harrington Hundreds                            | -64,729          | 32,319          |
| P              | Knapton Hill                                   | -64,723          | 32,317          |
| P              | Harrington Sound                               | -64,722          | 32,331          |
| P              | Leamington Caves                               | -64,709          | 32,343          |
| P              | Mullet Bay                                     | -64,693          | 32,375          |
| P              | Saint David's Head                             | -64,633          | 32,367          |
| <b>Brazil</b>  |                                                |                  |                 |
| P              | Amazonas, Manaus                               | -60,033          | -3,117          |
| A              | Mato Grosso, Utiariti, Rio Papagaio            | -58,283          | -13,033         |
| P*             | Mato Grosso do Sul, Pto. Murtinho              | -57,867          | -21,700         |
| P*             | Mato Grosso do Sul, Corumbá, Faz. Sta. Blanca. | -57,650          | -19,017         |
| P*             | Mato Grosso do Sul, Corumbá, Pto. Esperança    | -57,450          | -19,617         |
| P*             | Mato Grosso do Sul, Passo do Lontra            | -57,017          | -19,583         |
| P*             | Mato Grosso do Sul, Passo do Lontra            | -57,017          | -19,567         |
| P              | Rio Grande do Sul, N. Württemberg              | -53,500          | -28,300         |
| A              | Santa Catarina, N. Teutónia                    | -52,383          | -27,183         |
| P              | Rio Grande do Sul, Pelotas                     | -52,333          | -31,767         |
| A              | Rio de Janeiro, Maringá, Poço das Antas        | -52,000          | -23,400         |
| A              | Paraná, Rio Negro                              | -49,800          | -26,100         |
| A              | Santa Catarina, Blumenau                       | -49,050          | -26,933         |
| A              | São Paulo, Agudos                              | -49,000          | -22,467         |
| P              | Goiás, Anapolis                                | -48,967          | -16,333         |
| A              | Santa Catarina, Gaspar                         | -48,950          | -26,933         |
| A              | São Paulo, Lençóis, Pta.                       | -48,783          | -22,600         |
| A              | São Paulo, Anhembi, Faz B. Rico                | -48,117          | -22,800         |
| A              | Goiás, Alto Paraiso, Faz Bona Espera           | -47,517          | -14,117         |
| A              | São Paulo, Cajurú, Fazenda Santa Carlota       | -47,300          | -21,283         |
| A              | São Paulo, Genebra                             | -47,100          | -22,817         |
| A              | São Paulo, Barueri                             | -46,883          | -23,350         |

| <i>Pres Lh</i>  | <i>City/ Town/ Place</i>                      | <i>Longitude</i> | <i>Latitude</i> |
|-----------------|-----------------------------------------------|------------------|-----------------|
| A               | São Paulo, Sao Paulo                          | -46,617          | -23,717         |
| A               | São Paulo, Alto da Serra                      | -46,317          | -23,783         |
| A               | São Paulo, Salesopolis, Est. Biol. Boraceia   | -45,900          | -23,650         |
| A               | São Paulo, Campos do Jordão                   | -45,583          | -22,733         |
| A               | São Paulo, S. Sebastião, B. S. Francisco      | -45,417          | -23,800         |
| A               | São Paulo, Caraguatatuba, Res. Flor.          | -45,417          | -23,617         |
| A               | São Paulo, Guaratingueta                      | -45,217          | -22,817         |
| A               | São Paulo, Ilha dos Buzios                    | -45,133          | -23,800         |
| A               | São Paulo, Cunha, P. E. Serra do Mar          | -45,007          | -23,251         |
| P               | Minas Gerais, Sete Lagoas                     | -44,233          | -19,450         |
| A               | Minas Gerais, Serra Caraça                    | -43,500          | -20,133         |
| A               | Rio de Janeiro, Floresta de Tijuca            | -43,283          | -22,933         |
| P               | Rio de Janeiro, Rio de Janeiro                | -43,233          | -22,900         |
| A               | Rio de Janeiro, Petropolis                    | -43,167          | -22,517         |
| P               | Minas Gerais, Viçosa, Cafezal                 | -42,883          | -20,750         |
| A               | Espírito Santo, Santa Tereza                  | -40,600          | -19,917         |
| A               | Espírito Santo, Pedro Canario, Conc. de Barra | -39,750          | -18,583         |
| <b>Cameroon</b> |                                               |                  |                 |
| P               | Centre-Sud, Nkoemvom                          | 11,133           | 2,800           |
| <b>Chile</b>    |                                               |                  |                 |
| P               | Arauco                                        | -73,317          | -37,250         |
| P               | Malleco, Sierra Nahuelbuta                    | -73,217          | -38,017         |
| P               | Magallones, 4km W Laguna Amarga               | -72,450          | -50,590         |
| P               | Aisen, 8km W Chile Chico                      | -71,838          | -46,550         |
| P               | Coquimbo, P. N. Fray Jorge                    | -71,667          | -30,667         |
| P               | Valpariso, Plaza Victoria                     | -71,601          | -33,048         |
| P               | Quintero                                      | -71,533          | -32,783         |
| P               | Valparaiso, 10km E Viña del Mar               | -71,517          | -33,008         |
| P               | Puchuncavi                                    | -71,412          | -32,728         |
| P               | Santiago de Chile, Parque Forestal            | -70,667          | -33,450         |
| P               | Santiago, Questrada de la Plata               | -70,550          | -33,300         |
| P               | Maipu, La Rinconada                           | -70,470          | -33,310         |

| <i>Pres Lh</i>       | <i>City/ Town/ Place</i>                | <i>Longitude</i> | <i>Latitude</i> |
|----------------------|-----------------------------------------|------------------|-----------------|
| <b>Colombia</b>      |                                         |                  |                 |
| P                    | Quindio, Armenia                        | -75,700          | 4,500           |
| P                    | Medellin                                | -75,536          | -6,291          |
| P                    | Meta, la Macarena, Reserva              | -73,900          | 2,183           |
| <b>Easter Island</b> |                                         |                  |                 |
| P                    | Kau Ranu Crater                         | -109,450         | -27,150         |
| P                    | Hanga roa                               | -109,433         | -27,150         |
| <b>Ecuador</b>       |                                         |                  |                 |
| P                    | Pichincha, Mitad del Mundo              | -78,456          | -0,002          |
| P                    | Pichincha, Carapungo                    | -78,449          | -0,088          |
| <b>El Salvador</b>   |                                         |                  |                 |
| P                    | Quezaltepeque                           | -89,271          | 13,833          |
| <b>France</b>        |                                         |                  |                 |
| P                    | Grâce                                   | -1,933           | 47,483          |
| P                    | Maurès                                  | 0,817            | 44,683          |
| P                    | Toulouse                                | 1,433            | 43,600          |
| P                    | Port-Leucate                            | 3,033            | 42,917          |
| P                    | Sète                                    | 3,683            | 43,400          |
| P                    | Montpellier                             | 3,883            | 43,600          |
| P                    | La Grande Motte                         | 4,083            | 43,567          |
| P                    | Martigues                               | 5,050            | 43,400          |
| P                    | La Ciotat                               | 5,600            | 43,167          |
| P                    | Tamaris                                 | 5,900            | 43,083          |
| P                    | Toulon                                  | 5,933            | 43,117          |
| P                    | Provence-Alpes-Côte D'Azur, Hyères      | 6,117            | 43,117          |
| P                    | Le Lavandou                             | 6,367            | 43,133          |
| P                    | Provence-Alpes-Côte D'Azur, Castellane  | 6,517            | 43,850          |
| P                    | Provence Alpes Côte D'Azur, Ste. Maxime | 6,633            | 43,300          |
| P                    | Saint-Aygulf                            | 6,733            | 43,383          |
| P                    | Callian                                 | 6,750            | 43,633          |
| P                    | Saint Raphael                           | 6,767            | 43,417          |
| P                    | Esterel                                 | 6,817            | 43,533          |
| P                    | St. Jean de Cannes                      | 6,877            | 43,523          |

| <i>Pres Lh</i> | <i>City/ Town/ Place</i>            | <i>Longitude</i> | <i>Latitude</i> |
|----------------|-------------------------------------|------------------|-----------------|
| P              | Mandelieu                           | 6,933            | 43,550          |
| P              | Mougins                             | 7,000            | 43,600          |
| P              | Provence-Alpes-Cote d'Azur, Cannes  | 7,017            | 43,550          |
| P              | Iles de Lérins                      | 7,050            | 43,517          |
| P              | Vence                               | 7,117            | 43,717          |
| P              | Antibes                             | 7,117            | 43,583          |
| P              | Étang de Vaugrenier                 | 7,133            | 43,633          |
| P              | Barsur-Loup                         | 7,150            | 43,633          |
| P              | Nice                                | 7,250            | 43,700          |
| P              | Menton                              | 7,500            | 43,783          |
| P              | Calvi                               | 8,750            | 42,567          |
| <b>Germany</b> |                                     |                  |                 |
| P              | Hamburg                             | 9,817            | 54,133          |
| P              | Berlin, Botanical Garden            | 13,333           | 52,500          |
| <b>Italy</b>   |                                     |                  |                 |
| P              | Liguria, San Remo                   | 7,767            | 43,817          |
| P              | Genoa                               | 7,950            | 44,417          |
| P              | Alassio                             | 8,167            | 44,000          |
| P              | Celle Ligure                        | 8,550            | 44,333          |
| P              | Varazze, Savona                     | 8,633            | 44,367          |
| P              | Genoa                               | 8,950            | 44,417          |
| P              | Nervi                               | 9,033            | 44,383          |
| P              | Monégia                             | 9,500            | 44,233          |
| P              | Toscana, Monte Argentario Giannella | 11,167           | 42,417          |
| P              | Toscana, Orbetello, Faniglia        | 11,217           | 42,450          |
| P              | Rome                                | 12,483           | 41,900          |
| P              | Sicilia, Palermo                    | 13,367           | 38,117          |
| P              | Campania, Naples                    | 14,250           | 40,833          |
| <b>Japan</b>   |                                     |                  |                 |
| P              | Chugoku, Yamaguchi                  | 131,483          | 34,167          |
| P              | Yanai                               | 132,100          | 33,983          |
| P              | Iwakuni                             | 132,200          | 34,100          |
| P              | Iwakuni                             | 132,233          | 34,167          |

| <i>Pres Lh</i>     | <i>City/ Town/ Place</i>              | <i>Longitude</i> | <i>Latitude</i> |
|--------------------|---------------------------------------|------------------|-----------------|
| P                  | Hatsukaichi                           | 132,333          | 34,350          |
| P                  | Itsukaichi                            | 132,367          | 34,350          |
| P                  | Dejima                                | 132,450          | 34,350          |
| P                  | Ujina                                 | 132,467          | 34,350          |
| P                  | Onaga                                 | 132,500          | 34,400          |
| P                  | Fuchu                                 | 132,517          | 34,383          |
| P                  | Hiroshima, Yokkaichi                  | 133,333          | 34,767          |
| P                  | Chugoku, Kobe                         | 135,167          | 34,683          |
| P                  | Kobe                                  | 135,183          | 34,667          |
| <b>Lesotho</b>     |                                       |                  |                 |
| P                  | Maseru, Maseru                        | 27,483           | -29,317         |
| <b>Mexico</b>      |                                       |                  |                 |
| P                  | Baja California, Ensenada, Cortera FR | -116,626         | 31,861          |
| P                  | Baja California, 3.5mi WNW Catavina   | -115,004         | 29,886          |
| P                  | Baja California, Todos Santos         | -114,750         | 29,500          |
| P                  | Baja California, Guerro Negro         | -114,057         | 27,961          |
| P                  | Mexico City, Univesity Campus         | -99,139          | 19,434          |
| P                  | Distrito Federal, México              | -99,133          | 19,433          |
| <b>Monaco</b>      |                                       |                  |                 |
| P                  | Monaco                                | 7,417            | 43,733          |
| <b>Morocco</b>     |                                       |                  |                 |
| P                  | Tangier, Tangier                      | -5,817           | 35,783          |
| <b>Namib</b>       |                                       |                  |                 |
| P                  | Erongo, Swakopmund                    | 14,533           | -22,683         |
| P                  | Swakopmund                            | 14,533           | -22,650         |
| <b>New Zealand</b> |                                       |                  |                 |
| P                  | Kaitaia                               | 171,250          | -42,467         |
| P                  | Mt. Smart                             | 171,300          | -42,700         |
| P                  | Christchurch                          | 172,633          | -43,533         |
| P                  | Port Nelson                           | 173,267          | -41,267         |
| P                  | Nelson                                | 173,283          | -41,283         |
| P                  | Dargaville                            | 173,883          | -35,933         |
| P                  | Piha                                  | 174,467          | -36,950         |

| <i>Pres Lh</i>  | <i>City/ Town/ Place</i>                         | <i>Longitude</i> | <i>Latitude</i> |
|-----------------|--------------------------------------------------|------------------|-----------------|
| P               | Te Atatu                                         | 174,650          | -36,833         |
| P               | Warkworth                                        | 174,667          | -36,400         |
| P               | Hauraki Gulf                                     | 174,740          | -36,400         |
| P               | Kelburn                                          | 174,767          | -41,283         |
| P               | Auckland                                         | 174,767          | -36,867         |
| P               | Whangaparaoa                                     | 174,767          | -36,633         |
| P               | Wellington                                       | 174,783          | -41,300         |
| P               | Petone                                           | 174,883          | -41,233         |
| P               | Lower Hutt                                       | 174,917          | -41,217         |
| P               | Hamilton                                         | 175,283          | -37,783         |
| P               | Morrinsville                                     | 175,533          | -37,650         |
| P               | Tauranga Harbour                                 | 176,020          | -37,640         |
| P               | Mt Maunganui                                     | 176,167          | -37,617         |
| P               | Hastings                                         | 176,833          | -39,650         |
| P               | Bay of Penty                                     | 177,000          | -37,950         |
| <b>Paraguay</b> |                                                  |                  |                 |
| A               | Boqueron, P. N. Tte. Enciso                      | -61,667          | -21,200         |
| P*              | Boqueron, P. N. Defensores del Chaco, Cerro León | -60,333          | -20,417         |
| P*              | Pte. Hayes, 5km SE Pozo Colorado                 | -58,764          | -23,552         |
| P*              | Neembucu , Pilar                                 | -58,300          | -26,867         |
| P*              | Central, Asunción                                | -57,817          | -25,267         |
| P*              | Ñeembucu,                                        | -57,784          | -26,868         |
| P*              | Central, Asunción                                | -57,667          | -25,267         |
| P*              | Pte. Hayes, Villa Hayes                          | -57,567          | -25,100         |
| P*              | Pte. Hayes, Benjamín Aceval                      | -57,567          | -24,967         |
| P*              | Pte. Hayes, Rio Confuso, Ruta trans-chaco        | -57,550          | -25,100         |
| P*              | Central, San Lorenzo                             | -57,517          | -25,333         |
| P*              | Pte. Hayes, Rt. 5 across from Concepción         | -57,458          | -23,455         |
| P*              | Cordillera, San Bernadino                        | -57,317          | -25,267         |
| A               | Cordillera, Caacupé, Camp. J. Norment.           | -57,083          | -25,367         |
| P*              | San Pedro, Pto. Rosario.                         | -57,000          | -24,500         |
| A               | Canindeyú, Reserva Natural del Bosque Mbaracayú  | -55,533          | -24,133         |

| <i>Pres Lh</i>  | <i>City/ Town/ Place</i>                       | <i>Longitude</i> | <i>Latitude</i> |
|-----------------|------------------------------------------------|------------------|-----------------|
| <b>Peru</b>     |                                                |                  |                 |
| P               | Lima, Los Condores                             | -77,050          | -12,050         |
| P               | Lima                                           | -71,600          | -15,683         |
| <b>Poland</b>   |                                                |                  |                 |
| P               | Dolnoslaskie, Breslau                          | 17,033           | 51,100          |
| <b>Portugal</b> |                                                |                  |                 |
| P               | Azores, Sao Jorge                              | -28,050          | 38,633          |
| P               | Madeira, Porto Santo Calheta                   | -17,200          | 32,700          |
| P               | Madeira, Porto Moniz                           | -17,167          | 32,850          |
| P               | Madeira, Ribeira Brava                         | -17,067          | 32,650          |
| P               | Madeira, São Vicente                           | -17,050          | 32,800          |
| P               | Madeira, Caramujo                              | -16,933          | 32,767          |
| P               | Madeira, Funchal, Praia Formosa, Funchal       | -16,900          | 32,633          |
| P               | Madeira, Vale de Paraiso                       | -16,867          | 32,667          |
| P               | Madeira, Porto da Cruz                         | -16,833          | 32,767          |
| P               | Madeira, Ilheu Chão                            | -16,533          | 32,583          |
| P               | Madeira, Porto Santo, Serra de dentro- Juliana | -16,333          | 33,067          |
| P               | Lisboa, Praia das Macas                        | -9,467           | 38,817          |
| P               | Cascais                                        | -9,430           | 38,702          |
| P               | Lisboa, Cascais                                | -9,417           | 38,700          |
| P               | Lisboa, Estoril                                | -9,400           | 38,700          |
| P               | Sintra-Estremadura                             | -9,372           | 38,797          |
| P               | Lisboa, Mafra                                  | -9,333           | 38,933          |
| P               | Mafra                                          | -9,330           | 38,928          |
| P               | Lourinha                                       | -9,313           | 39,238          |
| P               | Oeiras                                         | -9,307           | 38,683          |
| P               | Torres Vedras                                  | -9,255           | 39,092          |
| P               | Peniche                                        | -9,252           | 39,355          |
| P               | Tapada da Ajuda (ISA)                          | -9,212           | 38,710          |
| P               | Montemor                                       | -9,200           | 38,817          |
| P               | Almuda                                         | -9,157           | 38,675          |
| P               | Sobral do Monte Agraco                         | -9,157           | 39,008          |
| P               | Bombanal                                       | -9,150           | 39,258          |

| <i>Pres Lh</i> | <i>City/ Town/ Place</i>                     | <i>Longitude</i> | <i>Latitude</i> |
|----------------|----------------------------------------------|------------------|-----------------|
| P              | Loures                                       | -9,148           | 38,828          |
| P              | Lisboa, Lisboa, Parque Florestal de Monsanto | -9,133           | 38,717          |
| P              | Quinta do Furadouro (CELBI)                  | -9,127           | 39,393          |
| P              | Caldas da Rainha                             | -9,127           | 39,407          |
| P              | Sesimbra                                     | -9,107           | 38,447          |
| P              | Cadaval                                      | -9,092           | 39,240          |
| P              | Acruda dos Vinhos                            | -9,072           | 38,982          |
| P              | Nazaré                                       | -9,057           | 39,595          |
| P              | Barreiro                                     | -9,047           | 38,648          |
| P              | Mata da Machada (SFN)                        | -9,028           | 38,622          |
| P              | Alenquer                                     | -9,010           | 39,057          |
| P              | Arrabida-Extremadura                         | -9,000           | 38,465          |
| P              | Vilafranca de Xira                           | -9,000           | 38,938          |
| P              | Moita                                        | -8,993           | 38,648          |
| P              | Alcobaca                                     | -8,977           | 39,543          |
| P              | Montijo                                      | -8,965           | 38,692          |
| P              | Rio Maior                                    | -8,930           | 39,342          |
| P              | Vila do Bispo                                | -8,913           | 37,078          |
| P              | Zona de Tróia (Setúbal)                      | -8,890           | 38,482          |
| P              | Setúbal                                      | -8,888           | 38,525          |
| P              | Samora correia                               | -8,860           | 38,939          |
| P              | Sires                                        | -8,860           | 37,960          |
| P              | Azambuja                                     | -8,860           | 39,070          |
| P              | Palmela                                      | -8,853           | 38,572          |
| P              | Figueira da Foz                              | -8,850           | 40,157          |
| P              | Nazaré                                       | -8,840           | 39,758          |
| P              | Esposende                                    | -8,825           | 41,523          |
| P              | Viana do Castelo                             | -8,825           | 41,708          |
| P              | Caminha                                      | -8,825           | 41,900          |
| P              | Batalha                                      | -8,818           | 39,657          |
| P              | Aljezur                                      | -8,802           | 37,297          |
| P              | Benavente                                    | -8,802           | 38,977          |
| P              | Porto de Mós                                 | -8,802           | 39,595          |

| <i>Pres Lh</i> | <i>City/ Town/ Place</i>     | <i>Longitude</i> | <i>Latitude</i> |
|----------------|------------------------------|------------------|-----------------|
| P              | Cartaxo                      | -8,790           | 39,167          |
| P              | Sesimbra                     | -8,790           | 37,720          |
| P              | Esposende                    | -8,787           | 41,540          |
| P              | Salvaterra de Magos          | -8,783           | 39,027          |
| P              | Barra                        | -8,748           | 40,643          |
| P              | Póvoa de Varzim              | -8,740           | 41,350          |
| P              | Vila do Conde                | -8,737           | 41,345          |
| P              | Faro, Algarve, Luz nr. Lagos | -8,733           | 37,083          |
| P              | Mira                         | -8,725           | 40,428          |
| P              | VilaNova de Cerveira         | -8,723           | 41,938          |
| P              | Porto, Leca de Palmeira      | -8,700           | 41,200          |
| P              | Santiago de Cacém            | -8,697           | 38,017          |
| P              | Matosinhos                   | -8,692           | 41,227          |
| P              | Santarem                     | -8,683           | 39,233          |
| P              | Vagos                        | -8,678           | 40,552          |
| P              | Lagos                        | -8,673           | 37,110          |
| P              | Santarém                     | -8,672           | 39,233          |
| P              | Zona de Pegoes-Gare          | -8,660           | 38,665          |
| P              | Ilhavo                       | -8,660           | 40,600          |
| P              | Pegoes                       | -8,643           | 38,673          |
| P              | Aveiro                       | -8,642           | 40,635          |
| P              | Espinho                      | -8,642           | 41,008          |
| P              | Murtosa                      | -8,630           | 40,737          |
| P              | Almeirim                     | -8,627           | 39,210          |
| P              | Soure                        | -8,625           | 40,060          |
| P              | Maia                         | -8,625           | 41,218          |
| P              | Valencia                     | -8,625           | 42,028          |
| P              | Porto, Oporto                | -8,617           | 41,150          |
| P              | Barcelos                     | -8,613           | 41,537          |
| P              | Vila Nova de Gaia            | -8,612           | 41,178          |
| P              | Oporto                       | -8,603           | 41,160          |
| P              | Ovar                         | -8,595           | 40,863          |
| P              | Ponte de Lima                | -8,595           | 41,790          |

| <i>Pres Lh</i> | <i>City/ Town/ Place</i> | <i>Longitude</i> | <i>Latitude</i> |
|----------------|--------------------------|------------------|-----------------|
| P              | Cantanhede               | -8,588           | 40,345          |
| P              | Alpiarca                 | -8,580           | 39,258          |
| P              | Estaneja                 | -8,565           | 40,758          |
| P              | Grandola                 | -8,557           | 38,167          |
| P              | Monchique                | -8,552           | 37,328          |
| P              | Paredes de Coura         | -8,537           | 41,947          |
| P              | Feira                    | -8,535           | 40,928          |
| P              | Portimao                 | -8,522           | 37,130          |
| P              | Comdre o Coruche         | -8,517           | 38,955          |
| P              | Gondomar                 | -8,517           | 41,140          |
| P              | Vila Nova de Famalicao   | -8,512           | 41,452          |
| P              | Alcácer do Sal           | -8,500           | 38,368          |
| P              | Condeixa-a-Nova          | -8,500           | 40,103          |
| P              | Golega                   | -8,493           | 39,398          |
| P              | Oliveira de Baioro       | -8,493           | 40,508          |
| P              | S. Joao de Madeira       | -8,487           | 40,890          |
| P              | Albergaria-a-Velha       | -8,485           | 40,697          |
| P              | Oliveira de Azemeis      | -8,475           | 40,845          |
| P              | Moncao                   | -8,475           | 42,075          |
| P              | Santo Tirso              | -8,470           | 41,345          |
| P              | Mealhada                 | -8,458           | 40,368          |
| P              | Lagoa                    | -8,453           | 37,130          |
| P              | Silves                   | -8,453           | 37,183          |
| P              | Agueda                   | -8,452           | 40,572          |
| P              | Vendas Novas             | -8,447           | 38,667          |
| P              | Vilanova de Barquinha    | -8,438           | 39,455          |
| P              | Anadia                   | -8,433           | 40,447          |
| P              | Braga                    | -8,433           | 41,557          |
| P              | Coimbra                  | -8,417           | 40,200          |
| P              | Coimbra                  | -8,417           | 40,213          |
| P              | Arcos de Valderez        | -8,417           | 41,883          |
| P              | Ponte da Barca           | -8,408           | 41,833          |
| P              | Tomar                    | -8,403           | 39,587          |

| <i>Pres Lh</i> | <i>City/ Town/ Place</i> | <i>Longitude</i> | <i>Latitude</i> |
|----------------|--------------------------|------------------|-----------------|
| P              | Penela                   | -8,403           | 40,022          |
| P              | Vilaverde                | -8,373           | 41,670          |
| P              | Pacos de Ferreira        | -8,357           | 41,280          |
| P              | Miranda do Corvo         | -8,333           | 40,095          |
| P              | Constancia               | -8,330           | 39,477          |
| P              | Guimaraes                | -8,300           | 41,467          |
| P              | Ferreira do Zezere       | -8,290           | 39,702          |
| P              | Penafiel                 | -8,282           | 41,202          |
| P              | Amares                   | -8,282           | 41,630          |
| P              | Castelo de Paiva         | -8,278           | 41,043          |
| P              | Penacova                 | -8,277           | 40,272          |
| P              | Louzada                  | -8,273           | 41,272          |
| P              | Povoa de Lanhoso         | -8,265           | 41,508          |
| P              | Albufeira                | -8,260           | 37,083          |
| P              | Figueiro dos Vinhos      | -8,255           | 39,890          |
| P              | Louza                    | -8,237           | 40,113          |
| P              | Mortágua                 | -8,225           | 40,403          |
| P              | Arouca                   | -8,225           | 40,928          |
| P              | Montemor                 | -8,215           | 38,630          |
| P              | Felgueiras               | -8,195           | 41,368          |
| P              | Oliveira da Frades       | -8,175           | 40,727          |
| P              | Mora                     | -8,157           | 38,942          |
| P              | Montemor-o-Novo          | -8,155           | 38,633          |
| P              | Fafe                     | -8,150           | 41,455          |
| P              | Vieira                   | -8,138           | 41,652          |
| P              | Marco de Canavezes       | -8,137           | 41,188          |
| P              | Loulé                    | -8,127           | 37,130          |
| P              | Santa Comba Bao          | -8,120           | 40,350          |
| P              | Amorante                 | -8,072           | 41,290          |
| P              | Tondela                  | -8,070           | 40,517          |
| P              | S. Pedro do Sol          | -8,058           | 40,758          |
| P              | Arganil                  | -8,047           | 40,218          |
| P              | Tálova                   | -8,037           | 40,358          |

| <i>Pres Lh</i>      | <i>City/ Town/ Place</i>   | <i>Longitude</i> | <i>Latitude</i> |
|---------------------|----------------------------|------------------|-----------------|
| P                   | Baiao                      | -8,023           | 41,153          |
| P                   | Viana do Alentejo          | -8,008           | 38,323          |
| P                   | Celorico de Basto          | -8,000           | 41,428          |
| P                   | Arraiolos                  | -7,993           | 38,713          |
| P                   | Carregal do Sal            | -7,993           | 40,433          |
| P                   | Faro                       | -7,942           | 37,017          |
| P                   | CastroD'aire               | -7,928           | 40,898          |
| P                   | Evora                      | -7,907           | 38,560          |
| P                   | Viseu                      | -7,903           | 40,657          |
| P                   | Evora                      | -7,900           | 38,567          |
| P                   | Cuba                       | -7,895           | 38,157          |
| P                   | Beja                       | -7,872           | 38,008          |
| P                   | Olhao                      | -7,860           | 37,025          |
| P                   | Nelas                      | -7,850           | 40,535          |
| P                   | Vidigueira                 | -7,802           | 38,202          |
| P                   | Mangualde                  | -7,747           | 40,605          |
| P                   | Tavira                     | -7,657           | 37,122          |
| P                   | S. Fiel,                   | -7,500           | 40,033          |
| P                   | Maura o Moura              | -7,453           | 38,130          |
| P                   | Vila Real do Santo António | -7,412           | 37,183          |
| P                   | Guarda-Serra de Estrela    | -7,110           | 40,535          |
| P                   | illa Nova de Milfonte      | -6,479           | 37,364          |
| P                   | Lagos                      | -6,440           | 37,024          |
| <b>South Africa</b> |                            |                  |                 |
| P                   | Springbok                  | 17,883           | -29,667         |
| P                   | Hout Bay                   | 18,350           | -34,033         |
| P                   | Western Cape, Table Mt.    | 18,417           | -33,967         |
| P                   | Western Cape, Capetown     | 18,417           | -33,917         |
| P                   | Cape Point                 | 18,483           | -34,350         |
| P                   | Newlands                   | 18,483           | -33,967         |
| P                   | Kogelberg Forest Reserve   | 18,567           | -34,233         |
| P                   | Jonkershoek                | 18,570           | -33,580         |
| P                   | Malmesbury                 | 18,733           | -33,450         |

| <i>Pres Lh</i> | <i>City/ Town/ Place</i>             | <i>Longitude</i> | <i>Latitude</i> |
|----------------|--------------------------------------|------------------|-----------------|
| P              | Somerset West                        | 18,850           | -34,083         |
| P              | Jonkershoek Mts., Stellenbosch       | 18,850           | -33,933         |
| P              | Stellenboschberg                     | 18,900           | -33,967         |
| P              | Clanwilliam                          | 18,900           | -32,183         |
| P              | Betty's Bay                          | 18,933           | -34,367         |
| P              | Paarl                                | 18,967           | -33,733         |
| P              | Jonkershoek                          | 18,967           | -33,967         |
| P              | Porterville                          | 18,983           | -33,017         |
| P              | Wellington                           | 19,000           | -33,633         |
| P              | Kleinmond                            | 19,033           | -34,350         |
| P              | Ceres                                | 19,317           | -33,367         |
| P              | Robertson                            | 19,883           | -33,800         |
| P              | Bredasdorp                           | 20,033           | -34,533         |
| P              | Swellendam                           | 22,433           | -34,033         |
| P              | Western Cape, nr. George             | 22,450           | -33,967         |
| P              | Graaff Reinet                        | 24,550           | -32,250         |
| P              | Northern Cape, Colesberg             | 25,100           | -30,733         |
| P              | Port Elizabeth                       | 25,583           | -33,967         |
| P              | Eastern Cape, Somerset East          | 25,583           | -32,717         |
| P              | Bloemfontein                         | 26,200           | -29,133         |
| P              | Eastern Cape, Queenstown             | 26,883           | -31,900         |
| P              | East London                          | 27,917           | -33,033         |
| P              | Johannesburg                         | 28,083           | -26,200         |
| P              | Pretoria                             | 28,217           | -25,700         |
| P              | Mpumalanga, Nelspruit                | 30,967           | -25,467         |
| <b>Spain</b>   |                                      |                  |                 |
| P              | Canarias, Orotava                    | -17,750          | 28,767          |
| P              | Canarias, Tenerife                   | -16,567          | 28,317          |
| P              | Canarias, Tenerife, Agua Mansa       | -16,483          | 28,350          |
| P              | Canarias, Tenerife, Ladera de Guimar | -16,433          | 28,283          |
| P              | Canarias, Tenerife, Volcán de Guimar | -16,383          | 29,317          |
| P              | Canarias, Cruz de Tejeda             | -15,600          | 28,017          |
| P              | Canarias, Santa Brígida              | -15,500          | 28,033          |

| <i>Pres Lh</i> | <i>City/ Town/ Place</i>                         | <i>Longitude</i> | <i>Latitude</i> |
|----------------|--------------------------------------------------|------------------|-----------------|
| P              | Canarials, Gran Canaria, Las Palmas, Tafira Alta | -15,450          | 28,050          |
| P              | Canarials, Gran Canaria, Las Palmas, Teide       | -15,417          | 28,000          |
| P              | Canarials, Las Palmas                            | -15,417          | 28,100          |
| P              | Galicia, La Coruña                               | -8,881           | 43,314          |
| P              | Galicia, Bayona, Mte. Ferro                      | -8,850           | 42,117          |
| P              | Galicia, Sanxenxo                                | -8,820           | 42,399          |
| P              | Galicia, Sangenjo-Pontevedra                     | -8,785           | 42,403          |
| P              | Galicia, Bayona                                  | -8,660           | 42,120          |
| P              | Extremadura, Badajoz                             | -6,953           | 38,872          |
| P              | Andalucía, Doñana                                | -6,500           | 37,017          |
| P              | Andalucía, Villafranca Guadalquivir              | -6,162           | 37,133          |
| P              | Andalucía, Conil                                 | -6,073           | 36,295          |
| P              | Andalucía, Sevilla                               | -6,073           | 37,046          |
| P              | Andalucía, Doñana                                | -5,989           | 37,378          |
| P              | Andalucía, Punta de Tarifa-Cádiz                 | -5,608           | 36,017          |
| P              | Andalucía, Jimena de la Frontera-Cádiz           | -5,465           | 36,420          |
| P              | Andalucía, Sotogrande                            | -5,358           | 36,256          |
| P              | Andalucía, Malaga                                | -4,417           | 36,717          |
| P              | Andalucía, Rincón de la Victoria                 | -4,281           | 36,714          |
| P              | Cantabria, Saja-Santander                        | -4,068           | 43,375          |
| P              | Madrid, Alarcón                                  | -3,814           | 40,436          |
| P              | Andalucía, Punta de la Mona                      | -3,713           | 36,727          |
| P              | Madrid, Madrid                                   | -3,698           | 40,412          |
| P              | Madrid                                           | -3,683           | 40,400          |
| P              | Cantabria, Santander                             | -3,637           | 43,468          |
| P              | Andalucía, Punta de Jesús                        | -3,600           | 36,740          |
| P              | Andalucía, Cultivos de Salobreña                 | -3,567           | 36,740          |
| P              | Madrid, Aranjuez                                 | -3,548           | 40,013          |
| P              | Andalucía, Puerto de Motril                      | -3,505           | 36,723          |
| P              | Andalucía, Motril                                | -3,500           | 36,740          |
| P              | Andalucía, Cultivos de Motril                    | -3,490           | 36,732          |
| P              | Andalucía, Torrenueva                            | -3,482           | 36,617          |
| P              | Andalucía, Desvío de Alpujarras                  | -3,482           | 36,860          |



| <i>Pres Lh</i> | <i>City/ Town/ Place</i>            | <i>Longitude</i> | <i>Latitude</i> |
|----------------|-------------------------------------|------------------|-----------------|
| P              | Andalucía, Torrenueva               | -3,477           | 36,713          |
| P              | Andalucía, Lanjarón                 | -3,467           | 36,927          |
| P              | Andalucía, Carchuna                 | -3,437           | 36,705          |
| P              | Andalucía, Castell de Ferro         | -3,177           | 36,732          |
| P              | Andalucía, El Castillo de Huarca    | -3,132           | 36,753          |
| P              | Catalunya, Platja d'Aro             | -3,067           | 41,817          |
| P              | Castilla y León, Soria              | -2,437           | 41,763          |
| P              | Murcia, La Alberca                  | -1,135           | 37,933          |
| P              | Murcia, Murcia                      | -1,132           | 37,982          |
| P              | Murcia, Cartagena                   | -1,040           | 37,629          |
| P              | València, Alberic                   | -1,035           | 39,782          |
| P              | Murcia, Torrevieja                  | -0,688           | 37,972          |
| P              | València, Guardamar                 | -0,651           | 38,147          |
| P              | València, Benimodo                  | -0,527           | 39,213          |
| P              | València, Sollana                   | -0,387           | 39,280          |
| P              | València, València                  | -0,376           | 39,482          |
| P              | València, El Saler                  | -0,323           | 39,388          |
| P              | València, Gola del Puchol-El Saler  | -0,297           | 39,308          |
| P              | València, Ribesalbes                | -0,280           | 40,021          |
| P              | València, Sagunto                   | -0,272           | 39,682          |
| P              | València, Benidorm                  | -0,125           | 38,536          |
| P              | València, Calpe                     | 0,045            | 38,643          |
| P              | València, Oropesa-Castelló          | 0,110            | 40,092          |
| P              | València, Calpe                     | 0,111            | 38,727          |
| P              | Catalunya, la Sénia                 | 0,283            | 40,636          |
| P              | València, Oropesa                   | 0,361            | 40,290          |
| P              | Catalunya, Ulldecona                | 0,448            | 40,598          |
| P              | Catalunya, Alcanar                  | 0,482            | 40,545          |
| P              | Catalunya, Tortosa                  | 0,523            | 40,812          |
| P              | Catalunya, Amposta                  | 0,581            | 40,710          |
| P              | Catalunya, Sant Carles de la Ràpita | 0,592            | 40,621          |
| P              | Catalunya, Rasquera                 | 0,600            | 41,003          |
| P              | Catalunya, Ampolla                  | 0,710            | 40,813          |

| <i>Pres Lh</i> | <i>City/ Town/ Place</i>           | <i>Longitude</i> | <i>Latitude</i> |
|----------------|------------------------------------|------------------|-----------------|
| P              | Catalunya, Deltebre                | 0,723            | 40,721          |
| P              | Catalunya, Ametlla de Mar          | 0,804            | 40,886          |
| P              | Catalunya, Hospitalet de l'Infant  | 0,925            | 40,992          |
| P              | Catalunya, Riudecols               | 0,977            | 41,170          |
| P              | Catalunya, Montbrió del Camp       | 1,005            | 41,121          |
| P              | Catalunya, Cambrils                | 1,054            | 41,075          |
| P              | Catalunya, Reus                    | 1,109            | 41,156          |
| P              | Catalunya, Salou                   | 1,134            | 41,077          |
| P              | Catalunya, Vila-seca               | 1,147            | 41,111          |
| P              | Catalunya, Tarragona               | 1,252            | 41,117          |
| P              | Catalunya, Altafulla               | 1,377            | 41,143          |
| P              | Catalunya, Torredembarra           | 1,400            | 41,146          |
| P              | Balears, Eivissa                   | 1,433            | 38,910          |
| P              | Balears, Formentera, Estany Pudent | 1,443            | 38,733          |
| P              | Balears, Jesús                     | 1,460            | 38,933          |
| P              | Catalunya, Bisbal del Penedès      | 1,489            | 41,282          |
| P              | Catalunya, Coma-ruga               | 1,525            | 41,184          |
| P              | Catalunya, Vendrell                | 1,536            | 41,223          |
| P              | Catalunya, Calafell                | 1,570            | 41,202          |
| P              | Catalunya, Sant Martí Sarroca      | 1,612            | 41,386          |
| P              | Catalunya, Cunit                   | 1,636            | 41,199          |
| P              | Catalunya, Vilafranca del Penedès  | 1,701            | 41,347          |
| P              | Catalunya, Canyelles               | 1,723            | 41,287          |
| P              | Catalunya, Vilanova i la Geltrú    | 1,726            | 41,224          |
| P              | Catalunya, Sant Pere de Ribes      | 1,774            | 41,263          |
| P              | Catalunya, Sant Sadurní d'Anoia    | 1,788            | 41,425          |
| P              | Catalunya, Sitges                  | 1,812            | 41,238          |
| P              | Catalunya, Castelldefels           | 1,977            | 41,279          |
| P              | Catalunya, Terrassa                | 2,015            | 41,566          |
| P              | Catalunya, Rubí                    | 2,033            | 41,493          |
| P              | Catalunya, Sant Cugat del Vallès   | 2,083            | 41,473          |
| P              | Catalunya, Prat de Llobregat       | 2,096            | 41,330          |
| P              | Catalunya, Barberà del Vallès      | 2,125            | 41,516          |

| <i>Pres Lh</i> | <i>City/ Town/ Place</i>             | <i>Longitude</i> | <i>Latitude</i> |
|----------------|--------------------------------------|------------------|-----------------|
| P              | Catalunya, Barcelona                 | 2,172            | 41,401          |
| P              | Catalunya, Montcada i Reixac         | 2,188            | 41,486          |
| P              | Catalunya, Aiguafreda                | 2,254            | 41,768          |
| P              | Catalunya, Seva                      | 2,285            | 41,840          |
| P              | Catalunya, Granollers                | 2,291            | 41,608          |
| P              | Catalunya, Teia                      | 2,324            | 41,498          |
| P              | Catalunya, Premià de Mar             | 2,360            | 41,491          |
| P              | Catalunya, Vilassar de Mar           | 2,393            | 41,505          |
| P              | Catalunya, Llinars del Vallès        | 2,402            | 41,640          |
| P              | Catalunya, Mataró                    | 2,445            | 41,541          |
| P              | Balears, Capdellà                    | 2,475            | 39,578          |
| P              | Catalunya, Sant Andreu de Llavaneres | 2,483            | 41,573          |
| P              | Catalunya, Olot                      | 2,489            | 42,183          |
| P              | Catalunya, Sant Celoni               | 2,492            | 41,689          |
| P              | Balears, Santa Ponsa                 | 2,493            | 39,517          |
| P              | Balears, Sa Porrassa                 | 2,500            | 39,500          |
| P              | Balears, Banyalbufar                 | 2,512            | 39,690          |
| P              | Balears, Cala Vinyas-La Porrassa     | 2,528            | 39,508          |
| P              | Balears, Puigpunyent                 | 2,528            | 39,625          |
| P              | Catalunya, Caldes d'Estrac           | 2,529            | 41,571          |
| P              | Balears, Esporlas                    | 2,558            | 39,670          |
| P              | Balears, Son Vida                    | 2,592            | 39,595          |
| P              | Balears, Génova-Son Dureta           | 2,597            | 39,558          |
| P              | Catalunya, Sant Pol de Mar           | 2,624            | 41,603          |
| P              | Catalunya, Hostalric                 | 2,636            | 41,747          |
| P              | Catalunya, Anglès                    | 2,639            | 41,958          |
| P              | Balears, Palma                       | 2,657            | 39,578          |
| P              | Balears, Son Sardina                 | 2,660            | 39,620          |
| P              | Catalunya, Calella                   | 2,664            | 41,616          |
| P              | Catalunya, Santa Coloma de Farners   | 2,664            | 41,864          |
| P              | Catalunya, Pineda de Mar             | 2,691            | 41,627          |
| P              | Catalunya, Santa Susanna             | 2,708            | 41,636          |
| P              | Balears, Port de Sóller              | 2,708            | 39,795          |

| <i>Pres Lh</i> | <i>City/ Town/ Place</i>             | <i>Longitude</i> | <i>Latitude</i> |
|----------------|--------------------------------------|------------------|-----------------|
| P              | Catalunya, Tordera                   | 2,720            | 41,700          |
| P              | Catalunya, Malgrat de Mar            | 2,743            | 41,645          |
| P              | Catalunya, Sils                      | 2,745            | 41,809          |
| P              | Balears, Mallorca, Bahía Azul        | 2,750            | 39,453          |
| P              | Balears, Arenal                      | 2,750            | 39,500          |
| P              | Catalunya, Banyoles                  | 2,767            | 42,119          |
| P              | Catalunya, Salt                      | 2,788            | 41,975          |
| P              | Catalunya, Sant Llorenç de la Muga   | 2,791            | 42,321          |
| P              | Catalunya, Blanes                    | 2,792            | 41,676          |
| P              | Balears, Alaró                       | 2,792            | 39,707          |
| P              | Catalunya, Riudellots de la Selva    | 2,807            | 41,895          |
| P              | Catalunya, Caldes de Malavella       | 2,811            | 41,839          |
| P              | Catalunya, Fornells de la Selva      | 2,813            | 41,935          |
| P              | Catalunya, Girona                    | 2,821            | 41,984          |
| P              | Catalunya, Quart                     | 2,842            | 41,939          |
| P              | Mallorca, Cala Pi                    | 2,842            | 39,363          |
| P              | Catalunya, Lloret de Mar             | 2,850            | 41,702          |
| P              | Catalunya, Cassà de la Selva         | 2,877            | 41,888          |
| P              | Catalunya, Llagostera                | 2,893            | 41,828          |
| P              | Balears, Mallorca, Lluchmajor        | 2,895            | 39,489          |
| P              | Catalunya, Bordils                   | 2,913            | 42,045          |
| P              | Balears, Inca-Inca                   | 2,913            | 39,718          |
| P              | Catalunya, Viladesens                | 2,932            | 42,096          |
| P              | Catalunya, Tossa de Mar              | 2,932            | 41,720          |
| P              | Balears, Mallorca, Sa Ràpita         | 2,938            | 39,367          |
| P              | Balears, Cabrera                     | 2,943            | 39,133          |
| P              | Catalunya, Figueres                  | 2,962            | 42,267          |
| P              | Balears, Inca-Sta. Magdalena         | 2,963            | 39,732          |
| P              | Catalunya, Sant Sadurni de l'Heura   | 2,993            | 41,958          |
| P              | Balears, Mallorca, Colònia St. Jordi | 3,000            | 39,318          |
| P              | Catalunya, Santa Cristina d'Aro      | 3,001            | 41,814          |
| P              | Catalunya, Rupià                     | 3,012            | 42,022          |
| P              | Catalunya, Corçà                     | 3,018            | 41,989          |

| <i>Pres Lh</i> | <i>City/ Town/ Place</i>          | <i>Longitude</i> | <i>Latitude</i> |
|----------------|-----------------------------------|------------------|-----------------|
| P              | Catalunya, Sant Feliu de Guíxols  | 3,030            | 41,784          |
| P              | Catalunya, Castell d'Aro          | 3,030            | 41,817          |
| P              | Catalunya, Parlavà                | 3,032            | 42,024          |
| P              | Catalunya, Ultramort              | 3,036            | 42,038          |
| P              | Catalunya, Bisbal d'Empordà       | 3,040            | 41,959          |
| P              | Catalunya, Verges                 | 3,048            | 42,063          |
| P              | Balears, Albufereta Pollensa      | 3,062            | 39,897          |
| P              | Catalunya, Platja d'Aro           | 3,068            | 41,819          |
| P              | Catalunya, Ullastret              | 3,070            | 42,001          |
| P              | Catalunya, Castelló d'Empúries    | 3,075            | 42,261          |
| P              | Catalunya, Viladamat              | 3,076            | 42,135          |
| P              | Catalunya, Calonge                | 3,077            | 41,862          |
| P              | Catalunya, Sant Pere Pescador     | 3,083            | 42,189          |
| P              | Catalunya, Bellcaire d'Empordà    | 3,096            | 42,080          |
| P              | Catalunya, Fontanilles            | 3,108            | 42,011          |
| P              | Catalunya, Ullà                   | 3,109            | 42,052          |
| P              | Catalunya, Palau-sator            | 3,111            | 41,990          |
| P              | Balears, S'Albufera d'Alcúdia     | 3,115            | 39,795          |
| P              | Catalunya, Sant Martí d'Empúries  | 3,119            | 42,142          |
| P              | Catalunya, Torroella de Montgrí   | 3,129            | 42,043          |
| P              | Balears, Mallorca, Santanyí       | 3,130            | 39,356          |
| P              | Catalunya, Palamós                | 3,131            | 41,850          |
| P              | Catalunya, Llofriu                | 3,132            | 41,930          |
| P              | Catalunya, Escala                 | 3,135            | 42,126          |
| P              | Catalunya, Pals                   | 3,150            | 41,971          |
| P              | Catalunya, Palau-saverdera        | 3,151            | 42,310          |
| P              | Catalunya, Llançà                 | 3,152            | 42,366          |
| P              | Catalunya, Palafrugell            | 3,165            | 41,918          |
| P              | Catalunya, Regencós               | 3,171            | 41,954          |
| P              | Catalunya, Cala Montgí            | 3,172            | 42,110          |
| P              | Catalunya, Roses                  | 3,179            | 42,263          |
| P              | Catalunya, Calella de Palafrugell | 3,186            | 41,890          |
| P              | Catalunya, Estartit               | 3,197            | 42,053          |

| <i>Pres Lh</i>              | <i>City/ Town/ Place</i>                        | <i>Longitude</i> | <i>Latitude</i> |
|-----------------------------|-------------------------------------------------|------------------|-----------------|
| P                           | Catalunya, Tamariu                              | 3,208            | 41,919          |
| P                           | Catalunya, Begur                                | 3,209            | 41,955          |
| P                           | Catalunya, Cap de la Barra                      | 3,213            | 42,057          |
| P                           | Balears, Cap de Formentor                       | 3,214            | 39,963          |
| P                           | Catalunya, Fornells                             | 3,216            | 41,940          |
| P                           | Catalunya, Cadaqués                             | 3,277            | 42,290          |
| P                           | Balears, Mallorca, Coves del Drac               | 3,332            | 39,534          |
| P                           | Balears, Mallorca, Coves d'Artà                 | 3,455            | 39,658          |
| P                           | Balears, Cala Gat-Capdepera                     | 3,467            | 39,715          |
| P                           | Balears, Cala Guyà                              | 3,467            | 39,720          |
| P                           | Balears, Minorca, Cala Forcat                   | 3,833            | 40,000          |
| P                           | Balears, Ciutadella                             | 3,845            | 40,000          |
| P                           | Balears, Galdana                                | 3,997            | 39,935          |
| P                           | Balears, Na Vermella                            | 4,140            | 40,025          |
| P                           | Balears, B. San Juan                            | 4,220            | 39,915          |
| P                           | Balears, Maó                                    | 4,250            | 39,943          |
| P                           | Balears, Sant Felip                             | 4,288            | 39,915          |
| P                           | Balears, Alcaufar                               | 4,292            | 39,832          |
| P                           | Balears, Binisermanya                           | 4,300            | 39,918          |
| <b>United Arab Emirates</b> |                                                 |                  |                 |
| P                           | Al Ain                                          | 55,700           | 24,217          |
| <b>United Kingdom</b>       |                                                 |                  |                 |
| P                           | Glasgow                                         | -4,250           | 55,833          |
| P                           | Plymouth                                        | -4,117           | 50,400          |
| P                           | Exeter                                          | -3,533           | 50,700          |
| P                           | Edinburgh, Edinburgh                            | -3,250           | 55,933          |
| P                           | Channel Islands, Guernsey                       | -2,467           | 49,483          |
| P                           | Manchester, Fallowfield                         | -2,217           | 53,433          |
| P                           | Cheshire, Broadbottom                           | -2,000           | 53,450          |
| P                           | Chillingham                                     | -1,900           | 55,517          |
| P                           | Hertfordshire, Tring                            | -0,650           | 51,783          |
| P                           | Farham House Lab, Imperial Bureau of Entomology | -0,617           | 51,533          |
| P                           | Enfield                                         | -0,067           | 51,667          |

| <i>Pres Lh</i> | <i>City/ Town/ Place</i>        | <i>Longitude</i> | <i>Latitude</i> |
|----------------|---------------------------------|------------------|-----------------|
| P              | Sussex, Lewes                   | -0,017           | 50,867          |
| P              | Eastbourne, East Sussex         | 0,250            | 50,800          |
| P              | W. Maidstone, Kent              | 0,517            | 51,267          |
| P              | Belfast, Windsor Park           | -5,933           | 54,583          |
| P              | Edinburgh, Botanic Gardens      | -3,200           | 55,950          |
| <b>Uruguay</b> |                                 |                  |                 |
| P*             | Colonia, Carmelo                | -58,283          | -33,983         |
| P*             | Mercedes                        | -58,019          | -33,256         |
| P*             | Colonia, Colonia del Sacramento | -57,841          | -34,479         |
| P*             | Montevideo                      | -56,167          | -34,850         |
| P*             | Carrasco                        | -56,061          | -34,885         |
| <b>USA</b>     |                                 |                  |                 |
| P              | Hawaii, Kauai, Hanapepe town    | -159,595         | 21,912          |
| P              | Hawaii, Kauai, Alakai Swamp     | -159,558         | 22,108          |
| P              | Hawaii, Kauai, Poipu            | -159,454         | 21,876          |
| P              | Hawaii, Kauai, Kokee            | -159,392         | 22,075          |
| P              | Hawaii, Oahu, Hale'iwa          | -158,113         | 21,590          |
| P              | Hawaii, Oahu, Opaehala          | -158,055         | 21,351          |
| P              | Hawaii, Oahu, Ewa               | -158,040         | 21,343          |
| P              | Hawaii, Oahu, Wahiawa           | -158,024         | 21,503          |
| P              | Hawaii, Oahu, Waipahu           | -158,003         | 21,231          |
| P              | Hawaii, Oahu, Pearl Harbor      | -157,972         | 21,355          |
| P              | Hawaii, Oahu, Halawa            | -157,912         | 21,383          |
| P              | Hawaii, Oahu, Hionalulu         | -157,858         | 21,307          |
| P              | Hawaii, Oahu, Mt. Tantalus      | -157,818         | 21,336          |
| P              | Hawaii, Oahu, Kaneohe Bay       | -157,810         | 21,463          |
| P              | Hawaii, Oahu, Kaneohe           | -157,804         | 21,418          |
| P              | Hawaii, Oahu, Nr. Waimanalo     | -157,721         | 21,350          |
| P              | Hawaii, Moanalua golf course    | -157,536         | 21,221          |
| P              | Hawaii, Oahu, Fort Shafter      | -157,531         | 21,212          |
| P              | Hawaii, Oahu, Nuuanu Valley     | -157,501         | 21,203          |
| P              | Hawaii, Lanai, Lanai City       | -156,922         | 20,831          |
| P              | Hawaii, Maui, Pukalani          | -156,337         | 20,837          |

| <i>Pres Lh</i> | <i>City/ Town/ Place</i>                            | <i>Longitude</i> | <i>Latitude</i> |
|----------------|-----------------------------------------------------|------------------|-----------------|
| P              | Hawaii, Maui, Auwahi                                | -156,333         | 20,638          |
| P              | Hawaii, Maui, Iao Needle                            | -156,332         | 20,532          |
| P              | Hawaii, Makawao                                     | -156,313         | 20,857          |
| P              | Hawaii, Kalepeamo                                   | -156,285         | 20,701          |
| P              | Hawaii, Maui, Silversword Inn                       | -156,248         | 20,771          |
| P              | Hawaii, Maui, Haleakala National Park               | -156,246         | 20,760          |
| P              | Hawaii, Maui, Hosmer Grove                          | -156,240         | 20,771          |
| P              | Hawaii, Maui, Olinda                                | -156,164         | 20,481          |
| P              | Hawaii, Hawaii, Pohakuloa                           | -155,650         | 18,934          |
| P              | Hawaii, Hawaii, Ahumoa                              | -155,614         | 19,812          |
| P              | Hawaii, Kemole                                      | -155,528         | 19,880          |
| P              | Hawaii, Saddle Road, Kipuka Puuhuhulu               | -155,464         | 19,687          |
| P              | Hawaii, Kamuela                                     | -155,421         | 20,015          |
| P              | Hawaii, Hawaii, Kipuka Puauulu                      | -155,304         | 19,447          |
| P              | Hawaii, Volcanos National Park, jagger museum       | -155,290         | 19,422          |
| P              | Hawaii, Mauna Kea Volcano                           | -155,282         | 19,493          |
| P              | Hawaii, Volcanos National Park, visitor's center    | -155,258         | 19,430          |
| P              | Hawaii, Kilauea crater                              | -155,250         | 19,417          |
| P              | Hawaii, Hawaii, Volcano                             | -155,238         | 19,431          |
| P              | Hawaii, Hawaii, Keauohana Forest Reserve            | -154,954         | 19,420          |
| P              | Hawaii, Maui, Kula                                  | -154,834         | 19,519          |
| P              | California, Humboldt, Eureka                        | -124,163         | 40,802          |
| P              | California, Humboldt, Redway                        | -123,817         | 40,117          |
| P              | Oregon, Josephine, Wonder                           | -123,534         | 42,364          |
| P              | California, Mendocino, Ukiah                        | -123,207         | 39,150          |
| P              | California, Sonoma, Russian R., 6km E<br>Healdsburg | -122,800         | 38,600          |
| P              | California, Sonoma, Santa Rosa                      | -122,713         | 38,441          |
| P              | California, Sonoma, Petaluma                        | -122,636         | 38,233          |
| P              | California, Marin, Sausalito                        | -122,484         | 37,859          |
| P              | California, San Mateo, San Bruno Mt.                | -122,433         | 37,683          |
| P              | California, Colusa, Leesville                       | -122,423         | 39,189          |
| P              | California, San Francisco                           | -122,418         | 37,775          |
| P              | California, Shasta, Redding                         | -122,391         | 40,587          |

| <i>Pres Lh</i> | <i>City/ Town/ Place</i>                                | <i>Longitude</i> | <i>Latitude</i> |
|----------------|---------------------------------------------------------|------------------|-----------------|
| P              | California, San Francisco, Lake Merced                  | -122,294         | 37,432          |
| P              | California, Napa, Napa                                  | -122,284         | 38,297          |
| P              | California, Alameda, Berkeley                           | -122,272         | 37,872          |
| P              | California, Alameda, Oakland                            | -122,270         | 37,804          |
| P              | California, Alameda, Berkeley                           | -122,250         | 37,867          |
| P              | California, Alameda                                     | -122,241         | 37,765          |
| P              | California, Redwood City                                | -122,235         | 37,485          |
| P              | California, Alameda, Piedmont                           | -122,231         | 37,824          |
| P              | California, San Mateo, Jasper Ridge Biological Preserve | -122,226         | 37,408          |
| P              | California, Jasper Ridge Biological Preserve            | -122,217         | 37,400          |
| P              | California, Glenn, Willows                              | -122,193         | 39,524          |
| P              | California, Contra Costa, Orinda                        | -122,179         | 37,877          |
| P              | California, Santa Clara, Palo Alto                      | -122,169         | 37,430          |
| P              | California, Contra Costa, Moraga                        | -122,129         | 37,835          |
| P              | California, Tehama                                      | -122,122         | 40,027          |
| P              | California, Alameda, Melrose                            | -122,122         | 37,461          |
| P              | California, Yolo, 6km W Capay.                          | -122,117         | 38,700          |
| P              | California, Cache Creek                                 | -122,060         | 38,710          |
| P              | California, Cupertino                                   | -122,031         | 37,323          |
| P              | California, Santa Cruz, Santa Cruz                      | -122,030         | 36,974          |
| P              | California, Ulatis Creek                                | -121,990         | 38,360          |
| P              | California, Alameda, Fremont                            | -121,988         | 37,548          |
| P              | California, Solano, Vacaville                           | -121,987         | 38,357          |
| P              | California, San Ramon, Athens Downs Park                | -121,977         | 37,780          |
| P              | California, Los Gatos                                   | -121,974         | 37,227          |
| P              | California, Santa Clara, Santa Clara                    | -121,954         | 37,354          |
| P              | California, Campbell                                    | -121,949         | 37,287          |
| P              | California, Santa Clara, San Jose                       | -121,894         | 37,339          |
| P              | California, Monterey, Monterey                          | -121,894         | 36,600          |
| P              | California, Santa Clara,                                | -121,878         | 37,199          |
| P              | California, Pleasanton                                  | -121,874         | 37,663          |
| P              | California, Yolo, Woodland, Willow Slough               | -121,785         | 38,605          |
| P              | California, Monterey Big Sur                            | -121,783         | 36,267          |

| <i>Pres Lh</i> | <i>City/ Town/ Place</i>                                          | <i>Longitude</i> | <i>Latitude</i> |
|----------------|-------------------------------------------------------------------|------------------|-----------------|
| P              | California, Livermore                                             | -121,767         | 37,682          |
| P              | California, Watsonville                                           | -121,756         | 36,910          |
| P              | California, Yolo, Davis                                           | -121,755         | 38,543          |
| P              | California, 0.6km S Arroyo Del Valle Sanatorium                   | -121,753         | 37,612          |
| P              | California, Willow Slough                                         | -121,750         | 38,600          |
| P              | California, Yolo, Davis                                           | -121,733         | 38,550          |
| P              | California, Monterey, Carmel                                      | -121,731         | 36,480          |
| P              | California, Santa Clara, South Coyote                             | -121,717         | 37,200          |
| P              | California, Yolo, Grasslands Regional Park, 8km SE Davis.         | -121,683         | 38,500          |
| P              | California, Monterey, Salinas                                     | -121,654         | 36,678          |
| P              | California, Contra Costa, Byron Hot Springs                       | -121,632         | 37,847          |
| P              | California, Gilroy                                                | -121,567         | 37,006          |
| P              | California, Santa Clara, Guadalupe resvr.                         | -121,524         | 37,116          |
| P              | California, Sacramento, Sacramento                                | -121,493         | 38,582          |
| P              | California, Corral Hollow Creek                                   | -121,460         | 37,660          |
| P              | California, Davis, University of California Davis                 | -121,445         | 38,323          |
| P              | California, San Joaquin, Stockton                                 | -121,290         | 37,958          |
| P              | California, San Joaquin, Caswell State Park.                      | -121,183         | 37,700          |
| P              | California, Monterey, King City                                   | -121,125         | 36,213          |
| P              | California, Lassen, Westwood Hills                                | -121,005         | 40,306          |
| P              | California, San Luis Obispo, Morro Bay State Park                 | -120,850         | 35,338          |
| P              | California, El Dorado, El Dorado                                  | -120,847         | 38,683          |
| P              | California, Amador, Jackson                                       | -120,773         | 38,349          |
| P              | California, San Luis Obispo, Oso Flaco Lake                       | -120,617         | 35,033          |
| P              | California, Modoc, Alturas                                        | -120,541         | 41,487          |
| P              | California, Santa Barbara, Santa Maria                            | -120,435         | 34,953          |
| P              | California, Nevada, Truckee                                       | -120,182         | 39,328          |
| P              | California, Santa Barbara, University of California Santa Barbara | -119,848         | 34,416          |
| P              | Nevada, Washoe, Reno                                              | -119,813         | 39,530          |
| P              | California, Fresno, Fresno                                        | -119,771         | 36,748          |
| P              | California, Santa Barbara, Santa Barbara                          | -119,697         | 34,421          |
| P              | California, Contra Costa, Fruitville                              | -119,082         | 35,383          |
| P              | California, Santa Paula                                           | -119,058         | 34,354          |

| <i>Pres Lh</i> | <i>City/ Town/ Place</i>                                      | <i>Longitude</i> | <i>Latitude</i> |
|----------------|---------------------------------------------------------------|------------------|-----------------|
| P              | California, Kern, Bakersfield                                 | -119,018         | 35,373          |
| P              | California, Los Angeles, Santa Monica Mts.                    | -118,750         | 34,083          |
| P              | California, Los Angeles, Tapia Park                           | -118,706         | 34,085          |
| P              | California, Los Angeles, Westwood Park                        | -118,462         | 34,053          |
| P              | California, Los Angeles, El Segundo                           | -118,416         | 33,919          |
| P              | California, Santa Catalina, Avalon                            | -118,327         | 33,343          |
| P              | California, Los Angeles, Pacific Palisades                    | -118,313         | 34,025          |
| P              | California, Harbor City                                       | -118,297         | 33,790          |
| P              | California, Los Angeles, University of California Los Angeles | -118,262         | 34,042          |
| P              | California, Los Angeles, Glendale                             | -118,254         | 34,143          |
| P              | California, Los Angeles, Los Angeles                          | -118,243         | 34,052          |
| P              | California, Los Angeles, Eagle Rock                           | -118,213         | 34,139          |
| P              | California, Los Angeles, University of Southern California    | -118,171         | 34,012          |
| P              | California, Los Angeles, Pasadena                             | -118,144         | 34,148          |
| P              | California, Los Angeles, Altadena                             | -118,130         | 34,190          |
| P              | California, Los Angeles, Eagle Rock                           | -118,110         | 34,080          |
| P              | California, Los Angeles, San Gabriel                          | -118,105         | 34,096          |
| P              | California, Humboldt, Arcadia                                 | -118,034         | 34,140          |
| P              | California, Los Angeles, Monrovia                             | -117,998         | 34,148          |
| P              | California, Orange, Newport Beach                             | -117,928         | 33,619          |
| P              | California, Orange, Fullerton                                 | -117,924         | 33,870          |
| P              | California, Orange, Costa Mesa                                | -117,918         | 33,641          |
| P              | California, Los Angeles, Azusa                                | -117,907         | 34,134          |
| P              | California, Orange, Santa Ana                                 | -117,867         | 33,746          |
| P              | California, Los Angeles, Tanbark Flats                        | -117,760         | 34,204          |
| P              | California, Los Angeles, Pomona                               | -117,751         | 34,055          |
| P              | California, Orange, San Juan Canyon                           | -117,706         | 33,508          |
| P              | California, San Bernadino, Ontario                            | -117,650         | 34,063          |
| P              | California, San Bernadino, Upland                             | -117,648         | 34,098          |
| P              | California, Alta Loma                                         | -117,597         | 34,122          |
| P              | California, Rancho Cucamonga                                  | -117,592         | 34,106          |
| P              | California, Orange, Trabuco Canyon                            | -117,577         | 33,657          |
| P              | Washington, Spokane, Spokane                                  | -117,425         | 47,659          |

| <i>Pres Lh</i> | <i>City/ Town/ Place</i>                                                 | <i>Longitude</i> | <i>Latitude</i> |
|----------------|--------------------------------------------------------------------------|------------------|-----------------|
| P              | California, San Diego, Point Loma                                        | -117,400         | 33,217          |
| P              | California, Riverside, Riverside                                         | -117,395         | 33,953          |
| P              | California, San Diego, San Luis Rey River                                | -117,391         | 33,202          |
| P              | California, San Diego, San Diego                                         | -117,350         | 33,367          |
| P              | California, San Diego, Mission Hills                                     | -117,317         | 33,250          |
| P              | California, Grand Terrace                                                | -117,313         | 34,034          |
| P              | California, San Bernadino, San Bernadino                                 | -117,289         | 34,108          |
| P              | California, Riverside, Temecula                                          | -117,288         | 33,505          |
| P              | California, San Diego, La Jolla                                          | -117,273         | 32,847          |
| P              | California, San Diego, Encinitas, Oak Crest Park                         | -117,267         | 33,033          |
| P              | California, San Diego, 1mi S Del Mar                                     | -117,264         | 32,945          |
| P              | California, San Diego, Del Mar                                           | -117,264         | 32,959          |
| P              | California, San Diego, Encinitas                                         | -117,260         | 33,050          |
| P              | California, San Diego, Torrey Pines State Reserve                        | -117,252         | 32,915          |
| P              | California, San Diego, Point Loma                                        | -117,251         | 32,723          |
| P              | California, San Diego, Torrey Pines State Res.                           | -117,250         | 32,917          |
| P              | California, San Diego, Del Mar, Torrey Pines St. Park                    | -117,247         | 32,941          |
| P              | California, San Diego, La Jolla                                          | -117,240         | 32,850          |
| P              | California, San Diego, Balboa Park                                       | -117,233         | 33,217          |
| P              | California, San Diego, Del Mar, Carmel Mountain                          | -117,217         | 33,931          |
| P              | California, San Diego, San Diego                                         | -117,212         | 32,815          |
| P              | California, San Diego, Rancho Santa Fe                                   | -117,202         | 33,020          |
| P              | California, San Diego, San Clemente Creek                                | -117,200         | 32,833          |
| P              | California, San Diego, San Diego                                         | -117,200         | 33,200          |
| P              | California, University of California Riverside                           | -117,195         | 33,582          |
| P              | California, San Diego, San Diego                                         | -117,166         | 32,737          |
| P              | California, San Diego, pacific beach                                     | -117,150         | 33,233          |
| P              | California, San Diego, Balboa Park                                       | -117,146         | 32,732          |
| P              | California, San Diego, Kate Sessions Park                                | -117,133         | 33,283          |
| P              | California, San Diego, Imperial Beach, Tijuana River Estuary             | -117,117         | 32,550          |
| P              | California, San Diego, University of California Elliot Chaparral Reserve | -117,108         | 32,892          |
| P              | California, San Diego, University of California Elliot Chaparral Reserve | -117,100         | 32,900          |
| P              | California, Riverside, Temecula                                          | -117,100         | 33,465          |

| <i>Pres Lh</i> | <i>City/ Town/ Place</i>                                     | <i>Longitude</i> | <i>Latitude</i> |
|----------------|--------------------------------------------------------------|------------------|-----------------|
| P              | California, San Diego, Escondido                             | -117,086         | 33,119          |
| P              | California, San Diego, San Diego                             | -117,057         | 32,748          |
| P              | California, San Diego, Chula Vista                           | -117,037         | 32,642          |
| P              | California, Riverside, Lake Skinner Camp C                   | -117,033         | 33,583          |
| P              | California, Riverside, Temecula, Lake Skinner<br>County Park | -117,031         | 33,352          |
| P              | California, San Diego, Chula Vista                           | -117,026         | 32,644          |
| P              | California, San Diego                                        | -117,003         | 32,413          |
| P              | California, San Diego, Chula Vista                           | -116,993         | 32,651          |
| P              | California, San Diego, El Cajon                              | -116,980         | 32,790          |
| P              | California, San Diego, Sweet Water Wildlife<br>Refuge        | -116,952         | 32,721          |
| P              | California, San Diego, El Cajon                              | -116,946         | 32,810          |
| P              | California, Riverside, Palm Springs                          | -116,544         | 33,830          |
| P              | Nevada, Clark, Las Vegas                                     | -115,136         | 36,175          |
| P              | Arizona, Yuma, Yuma                                          | -114,624         | 32,725          |
| P              | Arizona, Maricopa, Phoenix                                   | -112,073         | 33,448          |
| P              | Arizona, Pima, Tucson                                        | -110,553         | 32,132          |
| P              | Arizona, Cochise, Douglas                                    | -109,545         | 31,344          |
| P              | Texas, Lubbock , Lubbock                                     | -101,855         | 33,578          |
| P              | Texas, Bexar, San Antonio, Brackenridge Park                 | -98,493          | 29,424          |
| P              | Texas, Bexar, Brackenridge Park                              | -98,473          | 29,456          |
| P              | Texas, Brownsville                                           | -97,497          | 25,901          |
| P              | Texas, Williamson, Taylor                                    | -97,409          | 30,571          |
| P              | Texas, Dallas, Dallas                                        | -96,800          | 32,783          |
| P              | South Dakota, Brookings, Brookings                           | -96,798          | 44,311          |
| P              | Oklahoma, Caddo                                              | -96,263          | 34,127          |
| P              | Texas, Hopkins , Sulphur Springs                             | -95,601          | 33,138          |
| P              | Texas, Harris, Houston                                       | -95,363          | 29,763          |
| P              | Texas, Jefferson, Beaumont                                   | -94,102          | 30,086          |
| P              | Texas, Bowie, Texarkana                                      | -94,048          | 33,425          |
| P              | Arkansas, Miller, Texarkana                                  | -94,038          | 33,442          |
| P              | Louisiana, Caddo, Shreveport                                 | -93,750          | 32,525          |
| P              | Louisiana, Calcasieu, Lake Charles                           | -93,217          | 30,226          |
| P              | Minnesota, Ramsey, St. Paul                                  | -93,093          | 44,944          |

| <i>Pres Lh</i> | <i>City/ Town/ Place</i>                        | <i>Longitude</i> | <i>Latitude</i> |
|----------------|-------------------------------------------------|------------------|-----------------|
| P              | Louisiana, Evangeline                           | -92,571          | 30,262          |
| P              | Louisiana, Rapides, Alexandria                  | -92,445          | 31,311          |
| P              | Louisiana, Rapides, Cheneyville                 | -92,287          | 31,015          |
| P              | Louisiana, St. Landry, Opelousas                | -92,081          | 30,533          |
| P              | Louisiana, Avoyelles, Mansura                   | -92,049          | 31,058          |
| P              | Louisiana, Lafayette, Lafayette                 | -92,020          | 30,224          |
| P              | Louisiana, Iberia, New Iberia                   | -91,819          | 30,003          |
| P              | Louisiana, Franklin                             | -91,501          | 29,796          |
| P              | Louisiana, Pointe Coupee                        | -91,433          | 30,734          |
| P              | Mississippi, Wilkinson, Woodville               | -91,299          | 31,104          |
| P              | Louisiana, St. Mary, Berwick                    | -91,219          | 29,694          |
| P              | Louisiana, St. Mary, Morgan City                | -91,207          | 29,699          |
| P              | Louisiana, E. Baton Rouge, Baton Rouge          | -91,154          | 30,451          |
| P              | Louisiana, Ascension, Donaldsonville            | -90,993          | 30,101          |
| P              | Louisiana, Madison, Delta                       | -90,927          | 32,326          |
| P              | Mississippi, Warren, Vicksburg                  | -90,878          | 32,353          |
| P              | Louisiana, St. James, Convent                   | -90,830          | 30,021          |
| P              | Louisiana, Lafourche, Thibodeaux                | -90,823          | 29,796          |
| P              | Louisiana, Terrebonne, Schriever                | -90,810          | 29,742          |
| P              | Louisiana, Acadia                               | -90,801          | 29,769          |
| P              | Louisiana, St. Charles                          | -90,721          | 29,753          |
| P              | Louisiana, Houma                                | -90,719          | 29,596          |
| P              | Louisiana, Tangipahoa                           | -90,512          | 30,876          |
| P              | Mississippi, Copiah, Hazlehurst                 | -90,396          | 31,860          |
| P              | Mississippi, Copiah, Crystal Springs            | -90,357          | 31,987          |
| P              | Missouri, St. Louis, University City            | -90,309          | 38,656          |
| P              | Louisiana, New Orleans, Kenner                  | -90,259          | 33,039          |
| P              | Missouri, St. Louis, St. Louis, Botanic Gardens | -90,198          | 38,627          |
| P              | Mississippi, Hinds, Jackson area                | -90,185          | 32,299          |
| P              | Louisiana, Jefferson                            | -90,153          | 29,966          |
| P              | Louisiana, Orleans, Audubon Park                | -90,126          | 29,931          |
| P              | Louisiana, West End                             | -90,113          | 30,023          |
| P              | Louisiana, Orleans, New Orleans                 | -90,075          | 29,954          |

| <i>Pres Lh</i> | <i>City/ Town/ Place</i>                      | <i>Longitude</i> | <i>Latitude</i> |
|----------------|-----------------------------------------------|------------------|-----------------|
| P              | Louisiana, New Orleans                        | -90,067          | 29,967          |
| P              | Louisiana, Milneburg                          | -90,061          | 30,024          |
| P              | Tennessee, Shelby, Memphis                    | -90,049          | 35,149          |
| P              | Louisiana, Algiers                            | -90,047          | 29,945          |
| P              | Louisiana, St. Bernard                        | -89,859          | 29,867          |
| P              | Mississippi, Holmes, Durant                   | -89,854          | 33,075          |
| P              | Mississippi, Madison, Camden                  | -89,839          | 32,782          |
| P              | Louisiana, Plaquemines, Happy Jack            | -89,734          | 29,522          |
| P              | Louisiana, Plaquemines, Happy Jack            | -89,733          | 29,517          |
| P              | Louisiana, Nairn, Nairn                       | -89,611          | 29,428          |
| P              | Mississippi, Covington, Collins               | -89,555          | 31,645          |
| P              | Mississippi, Holmes, Holmes County State Park | -89,546          | 33,014          |
| P              | Louisiana, Plaquemines, Buras                 | -89,524          | 29,352          |
| P              | Mississippi, Forrest, Hattiesburg             | -89,290          | 31,327          |
| P              | Mississippi, Hancock, Bay Saint Louis         | -89,195          | 30,183          |
| P              | Mississippi, Choctaw, Ackerman                | -89,173          | 33,310          |
| P              | Mississippi, Perry                            | -89,141          | 30,721          |
| P              | Mississippi, Jones, Laurel                    | -89,131          | 31,694          |
| P              | Mississippi, Harrison, Gulfport               | -89,093          | 30,367          |
| P              | Tennessee, Obion, Kenton                      | -89,012          | 36,202          |
| P              | Mississippi, Oktibbeha, 3mi W Adaton          | -88,970          | 33,483          |
| P              | Mississippi, Harrison, Biloxi                 | -88,885          | 30,396          |
| P              | Mississippi, Jackson, Ocean Springs           | -88,828          | 30,411          |
| P              | Mississippi, Oktibbeha, Starkville            | -88,818          | 33,450          |
| P              | Mississippi, Oktibbeha, Starkville            | -88,817          | 33,450          |
| P              | Mississippi, Lauderdale, Meridian             | -88,704          | 32,364          |
| P              | Mississippi, Clay, West Point                 | -88,650          | 33,608          |
| P              | Mississippi, Jackson, Pascagoula              | -88,556          | 30,366          |
| P              | Mississippi, Monroe, Aberdeen                 | -88,544          | 33,825          |
| P              | Mississippi, Lowndes, Columbus                | -88,427          | 33,496          |
| P              | Mississippi, Clarke, Clarke County State Park | -88,415          | 32,055          |
| P              | Mississippi, Leflore, Greenwood Springs       | -88,309          | 33,887          |
| P              | Alabama, Mobile, Mobile                       | -88,043          | 30,694          |

| <i>Pres Lh</i> | <i>City/ Town/ Place</i>                   | <i>Longitude</i> | <i>Latitude</i> |
|----------------|--------------------------------------------|------------------|-----------------|
| P              | Illinois, Cook, Chicago                    | -87,650          | 41,850          |
| P              | Florida, Escambia, Gonzalez                | -87,291          | 30,581          |
| P              | Florida, Escambia, Pensacola               | -87,217          | 30,421          |
| P              | Tennessee, Giles, Pulaski                  | -87,031          | 35,200          |
| P              | Alabama, Jefferson, Birmingham             | -86,803          | 33,521          |
| P              | Florida, Okaloosa, Crestview               | -86,571          | 30,762          |
| P              | Tennessee, Lincoln, Fayetteville           | -86,571          | 35,152          |
| P              | Florida, Okaloosa, Niceville               | -86,482          | 30,517          |
| P              | Tennessee, Davidson, Nashville             | -86,470          | 36,096          |
| P              | Alabama, Auburn University                 | -85,485          | 32,602          |
| P              | Florida, Gulf, Port Saint Joe              | -85,303          | 29,812          |
| P              | Georgia, Meriweather, Talbot, Manchester   | -84,620          | 32,860          |
| P              | Georgia, Fulton, Atlanta                   | -84,388          | 33,749          |
| P              | Georgia, Gwinnett, Watton, Loganville      | -83,540          | 33,502          |
| P              | South Carolina, Pickens, Clemson           | -82,838          | 34,683          |
| P              | Florida, Pinellas, St. Petersburg          | -82,679          | 27,771          |
| P              | Florida, Hillsborough, Tampa               | -82,459          | 27,947          |
| P              | Florida, Hillsborough, Temple Terrace      | -82,389          | 28,035          |
| P              | South Carolina, Greenville, Travelers Rest | -82,264          | 34,580          |
| P              | South Carolina, McCormick, McCormick       | -82,174          | 33,545          |
| P              | South Carolina, Laurens, Gray Court        | -82,114          | 34,608          |
| P              | Georgia, Richmond, Augusta                 | -81,975          | 33,471          |
| P              | Florida, Polk, Winter Haven                | -81,733          | 28,022          |
| P              | Florida, Duval, Jacksonville               | -81,656          | 30,332          |
| P              | Florida, Highlands, Sebring                | -81,441          | 27,495          |
| P              | Florida, Orange, Orlando                   | -81,379          | 28,538          |
| P              | Florida, Seminole, Sanford                 | -81,273          | 28,800          |
| P              | South Carolina, York                       | -81,250          | 35,000          |
| P              | South Carolina, York, York                 | -81,242          | 34,994          |
| P              | Florida, Seminole, Oviedo                  | -81,208          | 28,670          |
| P              | North Carolina, Gaston, Belmont            | -81,038          | 35,243          |
| P              | South Carolina, Orangeburg, Orangeburg     | -80,856          | 33,492          |
| P              | Florida, Palm Beach, John Stretch Park     | -80,815          | 26,693          |



| <i>Pres Lh</i>   | <i>City/ Town/ Place</i>                   | <i>Longitude</i> | <i>Latitude</i> |
|------------------|--------------------------------------------|------------------|-----------------|
| P                | Florida, Broward, Davie                    | -80,233          | 26,063          |
| P                | North Carolina, Winston-Salem              | -80,144          | 36,056          |
| P                | South Carolina, Dorchester, Sumerville     | -80,103          | 33,011          |
| P                | Florida, Palm Beach, Delray Beach          | -80,073          | 26,461          |
| P                | South Carolina, Charleston, Charleston     | -79,931          | 32,776          |
| P                | South Carolina, Florence, Florence         | -79,763          | 34,195          |
| P                | South Carolina, Georgetown, Georgetown     | -79,295          | 33,377          |
| P                | South Carolina, Charleston, McClellanville | -79,274          | 33,052          |
| P                | North Carolina, Orange, Chapel Hill        | -79,056          | 35,913          |
| P                | North Carolina, Wake, Raleigh              | -78,639          | 35,772          |
| P                | North Carolina, Wayne, Goldsboro           | -77,993          | 35,385          |
| P                | North Carolina, New Hanover, Wilmington    | -77,945          | 34,226          |
| P                | Maryland, Baltimore, Baltimore             | -76,613          | 39,290          |
| <b>Venezuela</b> |                                            |                  |                 |
| P                | Aragua, Parque Nacional Rancho Grande      | -67,686          | 10,349          |
| <b>Zimbabwe</b>  |                                            |                  |                 |
| P                | Kolwa                                      | 32,667           | -17,050         |

**Appendix B** Sources of *Linepithema humile*'s occurrences

*Museum collections:*

Archbold Biological Station, Lake Placid, Florida, USA;  
Bishop Museum, University of Hawaii, Honolulu, Hawaii, USA;  
British Museum of Natural History, London, United Kingdom;  
California Academy of Sciences, San Francisco, California, USA;  
California State University, Northridge, California, USA;  
Clemson University, Clemson, South Carolina, USA.  
Combined Scientific Supplies, Midland, Texas, USA;  
Department of Entomology, University of Minnesota, Minneapolis, Minnesota, USA;  
Entomology Museum, Oregon Department of Agriculture, Salem, Oregon, USA;  
Entomology Research Museum, University of California, Riverside, California, USA;  
Essig Museum of Entomology, University of California, Berkeley, California, USA;  
Field Museum, Chicago, Illinois, USA;  
Florida Department of Agriculture and Consumer Services, Tallahassee, Florida, USA;  
Hawaii Department of Agriculture, Honolulu, Hawaii, USA;  
Honolulu Office, United States Geological Survey, Honolulu, Hawaii, USA;  
Instituto Fundación Miguel Lillo, Tucumán, Argentina;  
Los Angeles County Natural History Museum, Los Angeles, California, USA;  
Michigan State University, Lansing, Michigan, USA;  
Mississippi Entomological Museum, Mississippi State University, Mississippi, USA;  
Museo Argentina de Ciencias Naturales, Buenos Aires, Argentina;  
Museo Civico de Historia Natural 'Giacomo Doria', Genoa, Italy;  
Museo de Zoología de la Pontificia, Universidad Católica del Ecuador, Quito, Ecuador;  
Museo Nacional de la Historia Natural del Paraguay, San Lorenzo, Paraguay;  
Museu de Zoologia da Universidade de São Paulo, São Paulo, Brazil;  
Muséum d'Histoire Naturelle, Geneva, Switzerland;  
Museum of Comparative Zoology, Harvard University, Cambridge, Massachusetts, USA;  
Museum of Zoology, University of Michigan, Ann Arbor, Michigan, USA;  
National Museum of Natural History, Smithsonian Institution, Washington DC, USA;  
Natural History Museum of Los Angeles County, Los Angeles, California, USA;  
Naturhistorisches Museum, Basel, Switzerland;  
Naturhistorisches Museum Wien, Vienna, Austria;  
Ohio State University, Columbus, USA;  
Oklahoma State University, Stillwater, Oklahoma, USA;  
Oregon Department of Agriculture, Salem, Oregon, USA;  
Pennsylvania State University, Pennsylvania, USA;

Plant Industry Division, Plant Protection Section, North Carolina Department of Agriculture, Raleigh, North Carolina, USA;  
R. M. Bohart Museum of Entomology, Davis, California, USA;  
Snow Entomological Collections, Natural History Museum, University of Kansas, Lawrence, Kansas, USA;  
South Dakota State University, Brookings, South Dakota, USA;  
Texas A&M University Insect Collection, College Station, Texas, USA;  
University of Arizona, Tucson, Arizona, USA;  
University of Arkansas, Fayetteville, Arkansas, USA;  
University of Colorado, Boulder, Colorado, USA;  
University of Delaware, Newark, Delaware, USA;  
University of New Hampshire Insect Collection, Durham, New Hampshire, USA.

*Personal collections:*

Andrew V. Suarez personal collection, Urbana, Illinois, USA;  
Alexander L. Wild personal collection, Davis, California, USA.  
Crisanto Gómez personal collection, Girona, Catalunya, Spain;  
Philip S. Ward personal collection, Davis, California, USA;  
William P. MacKay personal collection, El Paso, Texas, USA;  
Xavier Espadaler personal collection, Barcelona, Catalunya, Spain;  
Yoshifumi Touyama personal collection, Higashi-Hiroshima, Japan;

*Scientific literature:*

Australian Ant Image Database ([http://ant.edb.miyakyo-u.ac.jp/AZ/PCD\\_SN.html](http://ant.edb.miyakyo-u.ac.jp/AZ/PCD_SN.html))  
Barber, E. R. 1916 The Argentine ant: distribution and control in the United States. *U. S. Dep. Agr. Bull.* **377**, 23 pp.  
Benois, A. 1973 Incidence des facteurs ecologiques sur le cycle annuel et l'activite saisonniere de la fourmi d'Argentine *Iridomyrmex humilis* (Mays) (Hymenoptera, Formicidae), dans la region d'Antibes. *Insect. Soc.* **20**, 267-295.  
Bernard, F. 1968 *Les fourmis (Hymenoptera formicidae) d'Europe occidentale et septentrionale*. Paris: Masson et Cie.  
Berry, J. A. 2001 Confirmation of the establishment of three adventive ants (Hymenoptera: Formicidae) in New Zealand: *Cardiocondyla minutior* Forel, *Ponera leae* Forel, *Mayriella abstinens* Forel. *New Zeal. Entomol.* **24**, 53–56.  
Bond, W. J. & Slingsby, P. 1984 Collapse of an ant-plant mutualism: the Argentine ant (*Iridomyrmex humilis*) and myrmecochorous Proteaceae. *Ecology* **65**, 1031–1037.  
Cammell, M. E., Way, M. J. & Paiva, M. R. 1996 Diversity and structure of ant communities associated with oak, pine, eucalyptus and arable habitats in Portugal. *Insect. Soc.* **43**, 37-46.  
Carpintero, S. 2001 *Repercusión de la hormiga argentina (Linepithema humile) en el parque nacional de Doñana*. Ph. D. Thesis. Córdoba: Universidad de Córdoba, Spain.  
Chen, J. S. C. & Nonacs, P. 2000 Nestmate recognition and intraspecific aggression based on environmental cues in Argentine ants (Hymenoptera: Formicidae). *Ann. Entomol. Soc. Am.* **93**, 1333-1339.  
Coetzee, J. H. & Giliomee, J. H. 1985 Insects in association with the inflorescence of *Protea-repens* Proteaceae and their role in pollination. *J. Entomol. Soc. S. Afr.* **48**, 303-314.

- Collingwood, C. A. & Yarrow, I. H. H. 1969 A survey of Iberian Formicidae (Hymenoptera). *Eos* **44**, 53-101.
- Collingwood, E. A., Tigar, B. J. & Agosti, D. 1997 Introduced ants in the United Arab Emirates. *J. Arid Environ.* **37**, 505-512.
- Comín, P. 1988 *Estudio de los formicidos de Balears: Contribución al estudio taxonómico, geográfico y biológico*. Ph. D. Thesis. Palma de Mallorca: Universidad de las Islas Balears.
- Cook, T. W. 1953 *The ants of California*. California: Pacific Books.
- Dale, W. E. 1974 Hormigas en viviendas y jardines de Lima metropolitana: *Iridomyrmex humilis* (Mayr) y *Monomorium pharaonis* (L). *Rev. Peru. Entomol.* **17**, 126-127.
- De Haro, A. & Collingwood, C. A. 1977 Prospección mirmecológica por Andalucía. *Bol. Est. Cent. Ecol.* **6**, 85-90.
- De Kock, A. E. & Giliomee, J. H. 1989 A survey of the Argentine ant, *Iridomyrmex humilis* (Mayr), (Hymenoptera: Formicidae) in South African fynbos. *J. Entomol. Soc. S. Afr.* **52**, 157-164.
- Donisthorpe, H. St. J. K. 1927 *British Ants, their life-history and classification*. London: G. Routledge & sons.
- Espadaler, X. & Gómez, C. 2003 The Argentine ant, *Linepithema humile*, in the Iberian Peninsula. *Sociobiology* **37**, 3-25.
- Ferrer, J. 2000 *Linepithema humile* (Mayr, 1868) fourmi argentine, présente dans le Midi de la France, découverte au Zimbabwe (Hymenoptera, Formicidae). *Nouv. Rev. Ent.* **17**, 289-290.
- Foster, E. 1908 The introduction of *Iridomyrmex humilis* (Mayr) into New Orleans. *J. Econ. Entomol.* **1**, 289-293.
- Giraud, T., Pedersen, J. S. & Keller, L. 2002 Evolution of supercolonies: The Argentine ant of southern Europe. *Proc. Nat. Acad. Sci. USA* **99**, 6075-6079.
- Gómez, K. & Espadaler, X. 2004 *La hormiga argentina: Estado del conocimiento e implicaciones de la invasion para las Islas Balears. Listado preliminary de hormigas de las Islas Balears*. Mallorca: Govern de Ses Illes Balears.
- Gordon, D. M., Moses, L., Falkovitz-Halpern, M., & Wong, E.H. 2001 Effect of weather on infestation of buildings by the invasive Argentine ant, *Linepithema humile* (Hymenoptera: Formicidae). *Am. Midl. Nat.* **146**, 321-329
- Harned, R. W. & Smith, M. R. 1922 Argentine ant control campaigns in Mississippi. *J. Econ. Entomol.* **15**, 261-264.
- Harris, R. J. 2002 Potential impact of the Argentine ant (*Linepithema humile*) in New Zealand and options for its control. *Sci. Conserv.* **196**, 36 pp.
- Haskins, C. P. & Haskins, E. F. 1988 Final observations on *Pheidole megacephala* and *Iridomyrmex humilis* in Bermuda. *Psyche* **95**, 177-184.
- Holway, D. A. & Case, T. J. 2000 Mechanisms of dispersed central-place foraging in polydomous colonies of the Argentine ant. *Anim. Beh.* **59**, 433-441.
- Holway, D. A., Suarez, A. V. & Case, T. J. 2002 Role of abiotic factors in governing susceptibility to invasion: a test with Argentine ants. *Ecology* **83**, 1610-1619.
- Holway, D. A. 1998 Factors governing rate of invasion: a natural experiment using Argentine ants. *Oecologia* **115**, 206-212.
- Hooper-bui L. M., Appel, A. G. & Rust, M. K. 2002 Preference of food particle size among several urban ant species. *J. Econ. Entomol.* **95**, 1222-1228.
- Human, K. G. & Gordon, D. M.. 1999 Behavioral interactions of the invasive Argentine ant with native ant species. *Insect Soc.* **46**, 159-163.
- Human, K. G.; Weiss, S., Weiss, A., Sandler, B., Gordon, D.M. 1998 Effects of abiotic factors on the distribution and activity of the invasive Argentine ant (Hymenoptera, Formicidae). *Environ. Entomol.* **27**, 822-833.
- Hymenopter Name Server ([http://atbi.biosci.ohio-state.edu:210/hymenoptera/db\\_entry.by\\_taxon?hidden\\_taxon\\_name=30468&module=check\\_for\\_map&text\\_entry=](http://atbi.biosci.ohio-state.edu:210/hymenoptera/db_entry.by_taxon?hidden_taxon_name=30468&module=check_for_map&text_entry=))
- Ingram, K. K. 2002 Plasticity in queen number and social structure in the invasive argentine ant (*Linepithema humile*). *Evolution* **56**, 2008-2016.
- Japanese Ant Image Database (<http://ant.edb.miyakyo-u.ac.jp/E/P/PCD3390/21.html>)
- Keller, L. 1988 Povoit attractif des reines de la fourmi d'Argentine, *Iridomyrmex humilis*. Role de la polygynie et du status physiologique des reines. *Bull. Soc. Vaudoise Sci. Nat.* **79**, 93-102.
- Lieberburg, I., Kranz, P. M. & Seip, A. 1975 Bermudian ants revisited: the status and interaction of *Pheidole megacephala* and *Iridomyrmex humilis*. *Ecology* **56**, 473-478.

- Majer, J. D. 1994 Spread of argentine ants (*Linepithema humile*), with special reference to Western Australia. In *Exotic Ants (Biology, Impact, and Control. of Introduced Species)* (ed. D. F. Williams), pp. 164-173. Boulder: Westview Press.
- Martínez, M. D., Ornos, C. & Gamarra, P. 1997 *Linepithema humile* (Mayr 1868) (Hymenoptera: Formicidae) en las viviewndas de Madrid. *Bol. Asoc. Esp. Entomol.* **21**, 275-276.
- Mannaki Whenua Landcare Research (<http://www.landcareresearch.co.nz/research/biosecurity/stowaways/antfactv3.pdf>)
- Ministri of Agriculture and Forestry, New Zealand (<http://www.maf.govt.nz/biosecurity/pests-diseases/animals/argentine-ant/investigations.htm>)
- Newell, W. & Barber, T.C. 1913 The Argentine ant. *U. S. Dep. Agric. Bur. Entomol. Bull.* **122**, 1-98.
- Orr, M. R., Seike, S.H., Benson, W.W. & Dahlsten, D. L. 2001 Host specificity of Pseudacteon (Diptera: Phoridae) parasitoids that attack *Linepithema* (Hymenoptera: Formicidae) in South America. *Environ. Entomol.* **30**, 742-747.
- Ortiz, F. J. & Tinaut, J. A. 1986 Distribuciones geográficas notables de los formicidos en el litoral granadino (Insecta, Hymenoptera). In *Actas de las Jornadas de la Asociacion Espanola de Entomologia*, pp. 1051-1061. Sevilla: Servicio Publicaciones Universidad de Sevilla.
- Passera, L. 1977 Peuplements myrmecologiques du cordon littoral du Languedoc-Roussillon: Modifications anthropiques. *Vie milieu* **27**, 249-265.
- Passera, L. 1994 Characteristics of tramp species. In *Exotic Ants: biology impact and control of introduced species* (ed. D.F. Williams), pp. 23-43. Boulder: Westview Press.
- Prins, A. J., Robertson, H. G. & Prins, A. 1990 Pests ants in urban and agricultural areas in Southern Africa. In *Applied myrmecology -a world perspective* (eds. R. K. Vander Meer, K. Jaffe & A. Cedeno), pp. 25-33. Boulder: Westview Press.
- Prins, A. J. 1978 Hymenoptera. In *Biogeography and Ecology of Southern Africa* (ed. M. J. A. Werger), pp. 823-875. The Hague: Junk.
- Rust, M. K. & Knight, R. L. 1990 Controlling Argentine ants in urban situations. In *Applied myrmecology -a world perspective* (eds. R. K. Vander Meer, K. Jaffe & A. Cedeno), pp. 663-670. Boulder: Westview Press.
- Shattuck, S. O. 1999 Australian ants: their biology and identification. Monographs on invertebrate taxonomy 3. Australia: CSIRO.
- Shorey, H. H., Gaston, L. K., Gerber, R. G., Phillips, P. A. & Wood, D. L. 1992 Disruption of foraging by Argentine ants, *Iridomyrmex humilis* (Mayr) (Hymenoptera: Formicidae), in citrus trees through the use of semiochemicals and related chemicals. *J. Chem. Ecol.* **18**, 2131-2142.
- Silva Dias, J. C. 1955 Biología e ecologia da formiga argentina (*Iridomyrmex humilis* Mayr) -Notas para o seu estudo em Portugal. *Bol. Jun. Nac. Fru.*, 1-117.
- Silverman, J. & Roulston, T. H. 2001 Acceptance and Intake of gel and liquid sucrose compositions by the argentine ant (Hymenoptera: formicidae). *J. Econ. Entomol.* **94**, 511-515.
- Skaife, S. H. 1954 The Argentine ant, *Iridomyrmex humilis* (Mayr.). *Trans. Roy. Soc. S. Af.* **34**, 355-378.
- Smith, M. R. 1936 Distribution of the Argentine Ant in the United States and suggestions for its control or eradication. *U. S. Dep. Agric. Cir.* **387**, 1-39.
- Suarez, A. V., Holway, D. A. & Case, T. J. 2001 Patterns of spread in biological invasions dominated by long-distance jump dispersal: Insights from Argentine ants. *Proc. Nat. Acad. Sci. USA* **98**, 1095-1100.
- Tinaut, A. 1981 *Estudio de los Formicidos de Sierra Nevada*. Ph. D. Thesis. Granda: University of Granada, Spain.
- Touyama, Y., Ogata, K. & Sugiyama, T. 2003 The Argentine ant, *Linepithema humile*, in Japan: Assessment of impact on species diversity on ant communities in urban environments. *Entom. Sci.* **6**, 57-66.
- Tsutsui, N. D., Suarez, A. V., Holway, D. A. & Case, T. J. 2001 Relationships among native and introduced populations of the Argentine ant (*Linepithema humile*) and the source of introduced populations. *Mol. Ecol.* **10**, 2151-2161.
- Van Schagen, J. J., Davis, P. R. & Widmer, M. A. 1993 Ant pests of Western Australia, with particular reference to the Argentine ant (*Linepithema humile*). In *Exotic Ants: biology impact and control of introduced species* (ed. D.F. Williams), pp. 174-180. Boulder: Westview Press.
- Vega, S. J. & Rust, M. K. 2001 The Argentine ant: A significant invasive species in agricultural, urban and natural environments. *Sociobiology* **37**, 3-25.

- Visser, D., Wright, M. G. & Giliomee, J. H. 1996 The effect of the Argentine ant, *Linepithema humile* (Mayr) (Hymenoptera, Formicidae), on flower-visiting insects of *Protea nitida* Mill (Proteaceae). *Afr. Entomol.* **4**, 285-287.
- Way, M. J., Cammell, M. E. & Paiva, M. R. 1992 Studies on egg predation by ants (Hymenoptera: Formicidae) especially on the eucalyptus borer *Phoracantha semipunctata* (Coleoptera: Cerambycidae) in Portugal. *Bul. Entomol. Res.* **82**, 425-432.
- Way, M. J., Cammell, M. E., Paiva, M. R. & Collingwood, C. A. 1997 Distribution and dynamics of the Argentine ant *Linepithema (Iridomyrmex) humile* Mayr in relation to vegetation, soil conditions, topography and native competitor ants in Portugal. *Insect. Soc.* **44**, 415-433.
- Wetterer, J. K., Banko, P. C., Laniawe, L. P., Slotterback, J. W. & Brenner, G. J. 1998 Non indigenous ants at high elevations on the Mauna Kea, Hawai'i. *Pac. Sci.* **52**, 228-236.
- Wetterer, J. K. 1998. Nonindigenous ants associated with geothermal and human disturbance in Hawaii Volcanoes National Park. *Pac. Sci.* **52**, 40-50.
- Wild, A. L. In press. Taxonomy and distribution of the Argentine ant, *Linepithema humile* (Hymenoptera: Formicidae). *Ann. Entomol. Soc. Am.* in press, accepted May 2004.
- Wilson, E. O. & Taylor, R. W. 1967 The ants of Polynesia (Hymenoptera: Formicidae). *Pac. Insects Monogr.* **14**, 1-109.
- Woodworth, C. W. 1908 The Argentine ant in California. *Univ. Ca. Agr. Exp. Stat. Cir.* **38**, 1-11.
